# Supplementary material for: Transcriptome and Metabolome Profiling Provide Insights into Flavonoid Synthesis in Acanthus ilicifolius Linn
Source: MDPI journal article supplement (doi:10.3390/genes14030752), 2023-03-20
Supplement: s1 [file s1]

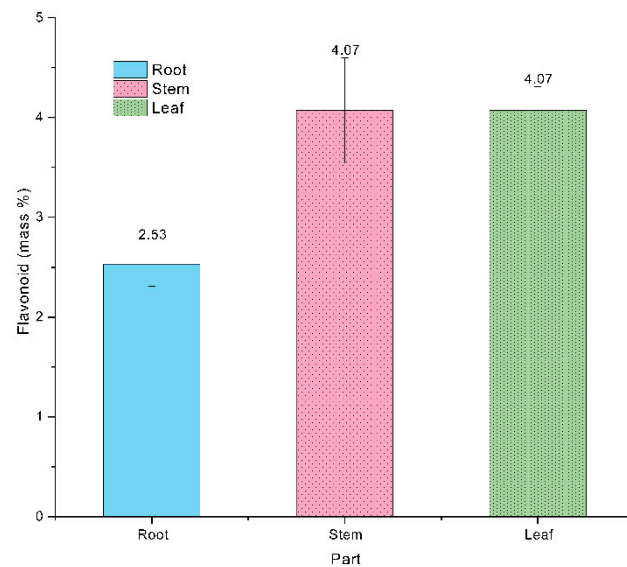

**Figure S1.** Total flavonoid content of roots, stems and leaves of *A. ilicifolius*. The determination of total flavonoid content was determined by the colorimetric method. The absorbance of flavonoids was measured at a wavelength of 506 nm, utilizing a visible spectrophotometer (PE Lambda-6, USA). The total flavonoid concentrations were calculated based on the linear equations derived from catechin (purity >97.50%, Macklin Inc, Shanghai) standard solutions of various concentrations. The equation obtained was  $y = 1.2051x - 0.0066$  ( $R^2 = 0.9988$ ,  $SEE = 0.0119$ ).
