# Supplementary material for: Transcriptome and Metabolome Profiling Provide Insights into Flavonoid Synthesis in Acanthus ilicifolius Linn
Source: Genes (Basel). 2023 Mar 20;14(3):752. doi: 10.3390/genes14030752 (PMC10048380; doi:10.3390/genes14030752)
Supplement: Supplementary file 1 [file genes-14-00752-s001.zip › Tables S1-S6.xlsx]

## Sheet: Table S1 
		Table S1. Sequences of primers
	Primer	Sequence(5'to3')	TM (℃)
	Actin-F	CATCTTCATCTGTGTAAC	58
	Actin-R	GTTGTTGACTTAACTTGT
	Ail37G016430-F	ACATTATCCAGTCCAACCACAAG	58
	Ail37G016430-R	ACCACTCGCCGTTCTCAA
	Ail39G001400-F	CCTCAGTGAAGATACGAAGA	58
	Ail39G001400-R	GGAAGAAGTTAGAGCAATAGC
	Ail39G001400-F	GTCCACTTCCCTTCTCTATGA	58
	Ail39G001400-R	CACACTAACCGCCACAAT
	Ail39G014320-F	GGCTTCCTCTTCCAACAG	58
	Ail39G014320-R	GGCGTCAACACCTATACTC
	Ail06G000840-F	ACTTAGCCGTTGATTGAC	58
	Ail06G000840-R	AACTTAGGTATGGAGGTAATG
	Ail10G013950-F	ATCGTCATCGTCATCTTCATCACT	58
	Ail10G013950-R	AATCCGCCAGGTCGTTGT
	Ail06G003130-F	AGTGCTGATTGGATAAGTAGG	58
	Ail06G003130-R	GCGATGGAACTGATGACA
	Ail13G001160-F	GGGTTTCTTCCAGGTGGTAAATC	58
	Ail13G001160-R	TCTTCAGCAGCCGCATCT
	Ail14G013060-F	AGCGACTCATACTTCAGGAT	58
	Ail14G013060-R	CGGAGCACTGCGATTATC

## Sheet: Table S2
		Table S2. RNA sequencing data and quality control
Samples	Clean reads	Clean bases	Mapped reads	GC Content	%≥Q30
mLO1	23082489	6.9 G	0.9734	0.4766	0.9386
mLO2	28036607	8.3G	0.8895	0.4925	0.9435
mLO3	21541593	6.4G	0.9725	0.4737	0.9492
mLY1	20070325	6.0G	0.9748	0.4769	0.9429
mLY2	28012640	8.4G	0.9741	0.4808	0.9423
mLY3	23354604	7.0G	0.9557	0.4759	0.9421
mRO1	22762475	6.8G	0.9754	0.479	0.9463
mRO2	21677033	6.5G	0.9703	0.4752	0.9441
mRO3	21035939	6.3G	0.9587	0.4812	0.9419
mRY1	20006083	6.0G	0.9723	0.4742	0.9433
mRY2	21791643	6.5G	0.8465	0.4813	0.9455
mRY3	22682612	6.8G	0.8845	0.4798	0.9439
mSO1	20500900	6.1G	0.9756	0.4733	0.94
mSO2	21014543	6.3G	0.9752	0.4728	0.9473
mSO3	29156661	8.7G	0.9736	0.4723	0.9407
mSY1	24892528	7.4G	0.974	0.4708	0.9339
mSY2	21409659	6.4G	0.9743	0.4773	0.9395
mSY3	22942117	6.8G	0.9758	0.4762	0.9444
mRY, mSY, and mLY represent young roots, young stems, and young leaves, respectively, and mOR, mOS, and mOL represent mature root, mature stem, and mature leaves, respectively.

## Sheet: Table S3
												Table S3. All metabolites detected in roots, stems and leaves of A. ilicifolius
Metabolite No.	Q1 (Da)	Rt (min)	Molecular Weight (Da)	Formula	Ionization model	Compounds	Class I	Class II	mLO1	mLO2	mLO3	mLY1	mLY2	mLY3	mRO1	mRO2	mRO3	mRY1	mRY2	mRY3	mSO1	mSO2	mSO3	mSY1	mSY2	mSY3	mix1	mix2	mix3	mix4
GQ512002	623.1	4.4	624.14	C28H32O16	[M-H]-	Isorhamnetin-3-O-rutinoside	Flavonoids	Flavonols	1620000	1540000	1360000	1660000	2060000	2070000	2240000	1240000	1740000	1730000	1740000	1600000	1480000	1600000	2080000	1900000	1920000	1370000	1480000	1830000	1790000	1740000
GQ512006	611.16	4.09	610.126	C27H30O16	[M+H]+	Quercetin-3-O-glucoside-7-O-rhamnoside	Flavonoids	Flavonols	1040000	995000	713000	189000	352000	146000	9	9	9	9	9	9	57100	77400	57400	46900	79800	32100	177000	309000	245000	265000
Hmln002124	487.14	3.46	488.154	C21H28O13	[M-H]-	Cistanoside F	Phenolic acids	Phenolic acids	5770000	6260000	8370000	5810000	4720000	6560000	1950000	553000	937000	3210000	10000000	1590000	877000	908000	1060000	1500000	1740000	2890000	3160000	3820000	3430000	3680000
Hmln002996	639.19	4.45	640.201	C29H36O16	[M-H]-	beta-Hydroxyacteoside	Phenolic acids	Phenolic acids	2760000	2780000	3220000	3010000	2250000	2430000	869000	1640000	1820000	2940000	2380000	1640000	851000	752000	619000	905000	735000	2140000	1700000	1930000	1810000	1810000
Hmlp002318	193.08	3.56	192.089	C10H12N2O2	[M+H]+	acancifoliuside	Alkaloids	Alkaloids	438000	439000	557000	139000	122000	114000	9	829000	178000	142000	182000	222000	57500	55900	53500	32700	17800	28200	192000	232000	253000	240000
Hmlp002407	166.05	3.67	165.042	C8H7NO3	[M+H]+	HBOA	Alkaloids	Alkaloids	1520000	1370000	1860000	3010000	2410000	2700000	4700000	2800000	3260000	4020000	3560000	4390000	1350000	2010000	1540000	2360000	3400000	2710000	2620000	2670000	2750000	2480000
Hmlp002408	328.1	3.67	327.095	C14H17NO8	[M+H]+	HBOA-Glc	Alkaloids	Alkaloids	1280000	1010000	1510000	2360000	1830000	2020000	3630000	2110000	2440000	3150000	2760000	3460000	919000	1340000	1100000	1830000	2570000	1940000	1420000	1930000	1770000	1750000
Hmlp002485	344.1	3.75	343.09	C14H17NO9	[M+H]+	DIBOA-Glc	Alkaloids	Alkaloids	31200000	28700000	29600000	41000000	40200000	40000000	54000000	21000000	47500000	34900000	42700000	35800000	31600000	36500000	38400000	46200000	45200000	44600000	27800000	35400000	36900000	40800000
Hmlp003262	200.01	4.64	199.003	C8H6ClNO3	[M+H]+	7-chloro-2-Hydroxy-2H-1,4-benzoxazin-3-(4H)-one	Alkaloids	Alkaloids	387000	387000	445000	504000	451000	347000	799000	5140000	2180000	2680000	1910000	2910000	288000	441000	361000	799000	348000	586000	764000	945000	747000	658000
Hmlp003264	362.06	4.64	361.056	C14H16ClNO8	[M+H]+	(2R)-7-chloro-2-O-β-D-glucoside-5-Hydroxy-2H-1,4-benzoxazin-3-(4H)-one	Alkaloids	Alkaloids	210000	208000	203000	268000	265000	188000	365000	2530000	1170000	1400000	903000	1430000	135000	184000	163000	330000	166000	284000	312000	442000	309000	304000
Huasheng_mad2395	667.18	4.79	668.146	C33H32O15	[M-H]-	Piceid-6''-p-coumaroyltartaric acid	Phenolic acids	Phenolic acids	7050	7640	6810	9	9	9	9	9	9	9	9	9	9	9	9	9	9	9	3930	2650	3110	2560
Li512113	451.1	3.38	452.076	C20H20O12	[M-H]-	Maleoyl-caffeoylquinic acid	Phenolic acids	Phenolic acids	16000	11400	10900	9	7660	8460	9	9	9	6050	6850	6940	4900	2980	4610	3000	5700	3050	6260	6010	8900	8630
Li512117	611.16	4.39	610.126	C27H30O16	[M+H]+	Quercetin 3-O-rhanosylgalactoside	Flavonoids	Flavonols	20900	25800	28200	13500	9340	7320	44100	28900	40500	49600	39400	74400	14700	21200	20500	26200	80200	34100	44200	72700	81700	49400
MWS2591	182.04	3.73	181.145	C8H7NO4	[M+H]+	2,4-dihydroxy-1,4-benzoxazin-3-one（DIBOA）	Alkaloids	Alkaloids	24900000	23600000	25000000	35900000	33700000	33300000	46300000	16700000	38400000	28100000	34800000	30100000	26800000	30100000	32700000	43000000	39100000	38800000	29800000	33000000	34600000	36600000
Qingke_Rfmb023-der01-3	372.09	2.77	373.083	C15H19NO10	[M-H]-	2,4-Dihydroxy-7-methoxy-1,4-benzoxazin-3-one	Alkaloids	Alkaloids	29200	27500	31800	11300	14100	9220	9	8930	4220	5860	4450	5210	9	9	9	9	9	9	13600	12700	10200	10500
Qingke_Rfmb056-der14-3	591.21	4.91	592.186	C29H36O13	[M-H]-	(+)-Medioresinol-aceGlu	Lignans and Coumarins	Lignans	7570	26900	4800	3690	7070	9140	9	9	9	9220	3420	2760	9	9	9	9	9	4300	8970	10600	6070	5960
Qingke_Rfmb087-1-1	311.22	6.51	312.208	C18H32O4	[M-H]-	13-Oxo-9-hydroxy-10-octadecenoic acid	Lipids	Free fatty acids	6340	5020	9640	11600	13100	8880	183000	81300	129000	94600	122000	142000	174000	144000	285000	150000	210000	70200	109000	112000	96300	73000
Qingke_Rfmb090-1-3	295.23	8.03	296.214	C18H32O3	[M-H]-	13-Hydroxy-9,11-octadecadienoic acid	Lipids	Free fatty acids	146000	91500	136000	121000	110000	104000	717000	123000	280000	247000	345000	314000	1770000	1500000	2990000	1080000	2260000	711000	732000	775000	729000	686000
Qingke_Rfmb091-1-1	295.23	8.03	296.214	C18H32O3	[M-H]-	9-Hydroxy-10,12-octadecadienoic acid	Lipids	Free fatty acids	155000	96500	147000	122000	118000	107000	756000	122000	306000	263000	362000	332000	1810000	1570000	3180000	1140000	2330000	728000	763000	818000	777000	738000
Qingke_Rfmb262-der01-3	579.21	4.69	580.186	C28H36O13	[M-H]-	Syringaresinol-Hex	Lignans and Coumarins	Lignans	6340000	6540000	8200000	2300000	3380000	2640000	16600	910000	355000	1100000	364000	563000	17900	20300	23600	24000	17500	41600	2330000	2530000	2720000	2750000
Qingke_Rfmb262-der14-1	621.21	4.89	622.195	C30H38O14	[M-H]-	Syringaresinol-aceGlu	Lignans and Coumarins	Lignans	2050000	2420000	2030000	435000	763000	591000	2740	127000	34000	365000	82700	152000	7600	13300	6670	13300	8950	30600	772000	912000	718000	684000
Qingke_Rfmb318-1-2	144.1	1.39	144.092	C7H14NO2+	[M]+	Proline betaine(ProBet)	Amino acids and derivatives	Amino acids and derivatives	104000	99800	107000	105000	209000	110000	14600	9740	12200	15100	18800	10800	15300	31300	19000	40200	37200	48900	77300	70500	69700	53600
Qingke_Rfmb319-1-2	130.09	1.41	129.07	C6H11NO2	[M+H]+	Pipecolic acid	Amino acids and derivatives	Amino acids and derivatives	189000	95300	99500	35000	40700	35600	313000	69200	127000	147000	215000	131000	150000	186000	166000	137000	137000	133000	136000	157000	147000	124000
Qingke_Rfmb320-1-3	144.1	1.39	143.085	C7H13NO2	[M+H]+	1,2-N-Methylpipecolic acid	Amino acids and derivatives	Amino acids and derivatives	725000	657000	592000	729000	625000	703000	876000	949000	735000	898000	741000	799000	753000	855000	993000	892000	870000	725000	919000	1080000	1050000	906000
YC512115	325.18	1.33	324.132	C19H20N2O3	[M+H]+	Nicotine-Hex	Alkaloids	Alkaloids	21200	28600	29800	10800	11700	11600	28700	35200	30900	43600	20100	24000	38300	35900	44300	32500	30600	10800	26900	29700	36700	27500
YC512118	282.28	10.19	281.249	C18H35NO	[M+H]+	Octadecenoic amide	Others	Others	335000	405000	175000	107000	418000	261000	414000	290000	499000	147000	223000	361000	187000	361000	381000	323000	174000	204000	117000	202000	236000	270000
YC512119	318.3	6.83	317.266	C18H39NO3	[M+H]+	Phytosphingosine	Others	Others	21200000	20100000	14600000	16800000	17900000	18900000	16700000	19200000	17800000	20900000	19100000	20600000	22000000	21700000	20800000	21400000	20100000	21400000	19500000	20100000	13700000	14200000
mws0001	133.05	1.24	132.046	C4H8N2O3	[M+H]+	L-Asparagine Anhydrous	Amino acids and derivatives	Amino acids and derivatives	22800	24100	12500	47000	42400	48200	111000	45100	56900	45400	64900	71900	427000	443000	257000	170000	229000	211000	110000	138000	143000	181000
mws0011	371.1	3.26	372.122	C17H24O9	[M-H]-	Syringin	Phenolic acids	Phenolic acids	6110	9	9	9	9	9	9	19900	13500	10900	10200	13400	9	9	9	9	9	9	10600	11900	13500	19600
mws0014	193.06	4.53	194.049	C10H10O4	[M-H]-	Ferulic acid	Phenolic acids	Phenolic acids	251000	275000	334000	233000	243000	266000	9	9	9	9	9	9	479000	510000	533000	794000	442000	767000	207000	303000	298000	283000
mws0017	146.2	1.07	145.144	C7H19N3	[M+H]+	Spermidine	Alkaloids	Phenolamine	3120	1760	2050	4120	3700	3620	4150	6010	4270	6230	6920	6820	3950	5160	4100	4660	4490	7720	7320	5260	3860	2960
mws0018	203	1.1	202.197	C10H26N4	[M+H]+	Spermine	Alkaloids	Phenolamine	9640000	9620000	9390000	9430000	8850000	8230000	12100000	11900000	11000000	14100000	11700000	12100000	12800000	12600000	13500000	12400000	12000000	9260000	13300000	14400000	13700000	12500000
mws0036	609.19	4.46	610.16	C28H34O15	[M-H]-	Hesperidin	Flavonoids	Dihydroflavone	43000	58600	48700	16000	9680	16200	56700	50000	83200	61500	88000	67200	33600	33400	35100	39600	48300	23800	107000	94000	156700	94000
mws0045	449.1	4.78	448.082	C21H20O11	[M+H]+	Quercitrin	Flavonoids	Flavonols	445	745	294	1520	391	544	5330	2990	4360	3350	32500	1770	1330	1880	2130	531	1190	1020	3920	2380	1450	2320
mws0047	579.17	4.82	578.137	C27H30O14	[M+H]+	Rhoifolin	Flavonoids	Flavonoid	8340000	10100000	10800000	4330000	4930000	3690000	9	9	9	9	9	9	227000	222000	270000	208000	193000	160000	1610000	2600000	2580000	2550000
mws0052	447.09	4.83	446.068	C21H18O11	[M+H]+	Baicalin	Flavonoids	Flavonoid	25400000	30000000	28500000	18300000	19700000	15900000	9250	4180	6710	53400	25700	15600	4900	2380	7180	34500	18200	8520	8230000	11700000	9290000	9260000
mws0057	451	4.16	450.096	C21H22O11	[M+H]+	Eriodictyol 7-O-glucoside	Flavonoids	Dihydroflavone	82300	72200	74000	35000	23600	16400	9	9	9	9	9	9	4500	11200	10500	8350	3120	17700	51800	58000	34800	26200
mws0058	299.06	6.1	300.053	C16H12O6	[M-H]-	Diosmetin	Flavonoids	Flavonoid	9	9	9	9	9	9	9	9	9	9	9	9	5220	5550	4640	8820	2910	4660	10200	8950	10500	4760
mws0059	609.1	4.23	610.126	C27H30O16	[M-H]-	Rutin	Flavonoids	Flavonols	185000	180000	209000	49800	60500	50900	191000	217000	372000	225000	358000	270000	110000	98500	101000	135000	183000	101000	425000	355000	220000	321000
mws0061	463.1	4.15	464.076	C21H20O12	[M-H]-	Hyperin	Flavonoids	Flavonols	612000	619000	292000	97600	260000	95000	9	9	9	9	9	9	6940	21700	16300	9	9	9	124000	146000	121000	145000
mws0066	315.06	6.31	316.047	C16H12O7	[M-H]-	Isorhamnetin	Flavonoids	Flavonols	16100	20500	17400	28100	26800	23800	80700	58700	58600	116000	113000	86100	38900	41500	34600	44600	46900	40700	138000	130000	204000	80400
mws0072	433.11	4.25	432.088	C21H20O10	[M+H]+	Apigenin 5-O-glucoside	Flavonoids	Flavonoid	13800	9710	13500	5670	4880	8520	9	9	9	9	9	9	5340	5700	14000	2950	3930	3900	5260	4560	4490	5110
mws0089	447.09	4.65	448.082	C21H20O11	[M-H]-	Kaempferol 7-O-glucosdie	Flavonoids	Flavonols	196000	254000	224000	97000	134000	86300	9	5290	3370	24300	3880	14600	55700	77500	127000	59800	48300	81000	149000	145000	124000	110000
mws0097	357.14	5.86	358.125	C20H22O6	[M-H]-	Pinoresinol	Lignans and Coumarins	Lignans	4390	3570	2150	1820	3420	3630	990	1300	815	1410	2100	1800	13200	26100	5140	3970	1690	16300	5610	4490	5290	3470
mws0098	160.05	5.49	161.042	C9H7NO2	[M-H]-	Indole-2-carboxylic acid	Alkaloids	Plumerane	6350	5740	4240	5080	2260	1610	4380	2500	2240	2380	1150	2210	4150	3930	4710	2410	1500	3850	5100	4150	4420	3410
mws0119	227.2	9.85	228.19	C14H28O2	[M-H]-	Myristic Acid	Lipids	Free fatty acids	19100000	16900000	14800000	20300000	21300000	18400000	20200000	18600000	18400000	22800000	19600000	19200000	22300000	22200000	22600000	22100000	23700000	21900000	21400000	23700000	26200000	21700000
mws0126	524.37	9.02	523.325	C26H54NO7P	[M+H]+	1-Stearoyl-sn-glycero-3-phosphocholine	Lipids	LPC	155000	195000	283000	106000	260000	144000	760000	435000	662000	410000	404000	404000	225000	348000	296000	221000	149000	306000	182000	278000	286000	168000
mws0133	123.1	1.99	122.043	C6H6N2O	[M+H]+	Nicotinamide	Others	Vitamin	583000	460000	589000	415000	234000	314000	495000	221000	262000	279000	316000	375000	263000	308000	382000	554000	348000	305000	342000	330000	412000	369000
mws0154	173.05	1.44	174.044	C7H10O5	[M-H]-	Shikimic acid	Organic acids	Organic acids	17500	15800	20100	26400	30600	32800	8260	4400	6520	6800	3290	3880	10200	9890	11600	8910	9790	10100	9920	12200	14400	14900
mws0159	163.05	3.86	164.041	C9H8O3	[M-H]-	Phenylpyruvic acid	Organic acids	Organic acids	38500	28700	44500	27100	25000	26400	9550	2760	6230	8360	11000	7120	8710	9830	7550	18100	13500	11400	37600	30800	19100	17800
mws0177	111.02	2.67	112.012	C5H4O3	[M-H]-	2-Furanoic acid	Organic acids	Organic acids	282000	220000	276000	115000	211000	131000	90100	54300	99600	81800	89900	95400	34800	29500	32500	23900	24300	64600	116000	96200	106000	111000
mws0178	353.1	3.24	354.079	C16H18O9	[M-H]-	Chlorogenic acid	Phenolic acids	Phenolic acids	3820000	4000000	3590000	724000	957000	1210000	10900	15700	16900	17700	231000	9380	1780000	1730000	2660000	1300000	1950000	662000	1470000	1690000	1460000	1430000
mws0180	153	3.07	154.021	C7H6O4	[M-H]-	2,5-Dihydroxybenzoic acid	Phenolic acids	Phenolic acids	59600	52500	32000	46800	63100	45700	9	9	9	51800	91900	120000	275000	308000	665000	328000	207000	94800	137000	138000	118000	100000
mws0191	118.1	1.28	117.07	C5H11NO2	[M+H]+	Betaine	Alkaloids	Alkaloids	17000000	15600000	15900000	14600000	13400000	12900000	12600000	4150000	9610000	5860000	5620000	6110000	13100000	14500000	14100000	13000000	13300000	11300000	9830000	11000000	11600000	12000000
mws0192	117.03	1.81	118.021	C4H6O4	[M-H]-	Succinic acid	Organic acids	Organic acids	2400000	2150000	2560000	1500000	1860000	1520000	4860000	480000	2620000	1020000	1010000	1560000	2450000	2830000	3220000	1830000	1310000	1670000	1750000	1870000	1770000	1860000
mws0193	190.1	1.33	189.099	C7H15N3O3	[M+H]+	L-Homocitrulline	Amino acids and derivatives	Amino acids and derivatives	1560	1770	2420	1680	566	1050	21900	4670	12300	7410	6480	6470	3720	3320	2410	5110	2390	6490	4830	5710	3960	7340
mws0198	179	1.26	180.053	C6H12O6	[M-H]-	D-(+)-Glucose	Others	Saccharides and Alcohols	152000	158000	177000	93400	121000	116000	310000	71500	191000	105000	137000	122000	83900	91900	82200	71300	75300	70400	109000	131000	112000	115000
mws0213	151	1.27	152.058	C5H12O5	[M-H]-	Ribitol	Others	Saccharides and Alcohols	9240	7980	8610	7460	8940	9	9820	9	7020	9	9	9	9	9	9	9	9	9	1080	1050	1090	1090
mws0214	181	1.24	182.067	C6H14O6	[M-H]-	D-Sorbitol	Others	Saccharides and Alcohols	68300	56000	48800	51400	45700	67300	9	9	9	5060	5570	4190	877	3820	3000	5910	2140	2410	14400	11500	10800	9870
mws0219	132	1.21	133.03	C4H7NO4	[M-H]-	L-AsparticAcid	Amino acids and derivatives	Amino acids and derivatives	66100	52900	56900	54900	57600	42500	215000	50500	74100	62800	96200	97100	141000	187000	148000	128000	106000	124000	71400	74900	71400	91000
mws0227	132.1	1.7	131.085	C6H13NO2	[M+H]+	L-Leucine	Amino acids and derivatives	Amino acids and derivatives	2050000	1340000	1180000	1500000	1640000	1440000	22400000	1970000	8980000	3220000	2750000	4290000	4400000	5660000	4060000	2960000	1800000	3230000	4570000	4680000	4870000	4580000
mws0232	377	3.71	376.12	C17H20N4O6	[M+H]+	Riboflavin	Others	Vitamin	218000	171000	307000	213000	205000	226000	253000	33000	104000	65400	73600	72900	168000	171000	227000	229000	208000	160000	105000	161000	151000	153000
mws0236	124	1.25	125.008	C2H7NO3S	[M-H]-	2-Aminoethanesulfonic acid	Organic acids	Organic acids	23600	27300	30000	7190	6480	3950	275	977	1310	939	1890	1430	1820	3270	1820	1360	1200	2080	3460	3880	3680	3600
mws0248	243.1	1.69	244.058	C9H12N2O6	[M-H]-	Uridine	Nucleotides and derivatives	Nucleotides and derivatives	203000	169000	289000	151000	155000	130000	392000	61600	204000	89300	105000	131000	506000	498000	561000	372000	394000	284000	282000	243000	218000	221000
mws0250	182.1	1.63	181.065	C9H11NO3	[M+H]+	L-(-)-Tyrosine	Amino acids and derivatives	Amino acids and derivatives	1140000	639000	582000	1030000	1280000	878000	3480000	746000	1300000	1310000	1420000	1340000	3580000	3340000	3480000	2570000	1950000	2070000	2060000	1980000	1940000	1940000
mws0255	112	1.25	111.038	C4H5N3O	[M+H]+	Cytosine	Nucleotides and derivatives	Nucleotides and derivatives	56800	50100	78000	45100	47900	38100	148000	23800	60500	34700	45800	40900	112000	97900	98500	77600	87000	68400	61100	74700	56400	51700
mws0256	118.1	1.34	117.07	C5H11NO2	[M+H]+	L-Valine	Amino acids and derivatives	Amino acids and derivatives	721000	489000	554000	459000	516000	389000	2740000	450000	1140000	814000	768000	917000	1220000	1590000	1120000	948000	843000	971000	904000	916000	923000	823000
mws0258	132	1.73	131.085	C6H13NO2	[M+H]+	L-Isoleucine	Amino acids and derivatives	Amino acids and derivatives	1800000	1190000	1360000	1400000	1470000	1330000	20700000	2040000	9590000	3420000	2990000	4130000	4120000	6020000	3750000	2860000	2040000	3500000	4900000	4560000	4760000	4370000
mws0262	149	1.58	150.009	C4H6O6	[M-H]-	L-(+)-Tartaric acid	Organic acids	Organic acids	7310	10300	8720	8600	7600	7480	10400	5170	6670	3750	6330	5380	3320	4680	4170	4530	4380	5690	6310	5290	6200	4980
mws0264	341	1.22	342.096	C12H22O11	[M-H]-	D-(+)-TrehaloseAnhydrous	Others	Saccharides and Alcohols	30500	39000	43500	42000	30500	47800	83700	38900	128000	71400	82600	61700	50800	73400	45700	30500	17800	58700	45800	46400	45900	46200
mws0275	133	1.47	134.015	C4H6O5	[M-H]-	L-(-)-Malic acid	Organic acids	Organic acids	3060000	3060000	4830000	2880000	2880000	2190000	4710000	649000	3340000	1510000	1590000	2780000	4290000	4750000	4250000	2570000	2220000	2850000	2670000	2850000	2660000	2620000
mws0277	191	1.63	192.053	C7H12O6	[M-H]-	Kinic acid	Organic acids	Organic acids	783000	890000	1280000	427000	463000	313000	590000	576000	621000	593000	583000	661000	2170000	2150000	1950000	533000	334000	778000	991000	825000	770000	716000
mws0281	191	1.34	192.018	C6H8O7	[M-H]-	Citric Acid	Organic acids	Organic acids	14500000	15000000	28000000	5270000	5520000	3880000	5720000	3100000	4930000	4740000	4410000	4980000	25700000	26600000	25700000	6420000	3460000	9290000	10100000	9950000	10100000	10100000
mws0289	478.1	7.99	479.268	C23H46NO7P	[M-H]-	LysoPE 18:1	Lipids	LPE	1170000	442000	802000	1820000	1930000	2100000	2540000	2850000	3270000	4060000	10200000	8270000	1730000	1920000	2370000	10400000	7060000	4140000	4270000	4410000	3850000	2930000
mws0328	181	2.98	182.049	C9H10O4	[M-H]-	DL-P-hydroxyphenyllactic acid	Organic acids	Organic acids	2530	3090	3850	2080	2130	1200	28200	17000	22300	16700	16600	20900	13500	13600	14200	15900	7580	10800	11400	10400	7990	10100
mws0344	165.05	1.45	166.038	C5H10O6	[M-H]-	D-Xylonic acid	Organic acids	Organic acids	1060000	1120000	1230000	507000	595000	496000	599000	148000	363000	216000	286000	271000	143000	165000	108000	164000	202000	176000	309000	337000	326000	337000
mws0359	241.22	10.38	242.205	C15H30O2	[M-H]-	Pentadecanoic Acid	Lipids	Free fatty acids	92000	76500	72000	109000	85700	101000	117000	147000	125000	133000	148000	148000	121000	108000	123000	149000	110000	103000	128000	107000	99700	76400
mws0361	253.22	9.85	254.205	C16H30O2	[M-H]-	Palmitoleic Acid	Lipids	Free fatty acids	17700	15200	12900	13100	11100	9570	27500	39600	20700	44400	30400	24300	16300	6960	11200	12600	14200	13300	22100	24000	23000	20000
mws0366	277.22	9.78	278.205	C18H30O2	[M-H]-	γ-Linolenic Acid	Lipids	Free fatty acids	16600000	11100000	14600000	13900000	13800000	13400000	1820000	433000	768000	780000	1200000	1280000	9670000	9970000	11800000	9400000	8950000	5970000	8720000	9540000	11100000	10500000
mws0367	277.1	9.56	278.205	C18H30O2	[M-H]-	α-Linolenic Acid	Lipids	Free fatty acids	36100	24700	31000	31100	29400	29700	3850	670	1620	1890	2910	2720	19100	21100	25000	19100	18300	12700	18100	20800	23500	22700
mws0369	303.1	9.96	304.219	C20H32O2	[M-H]-	Arachidonic Acid	Lipids	Free fatty acids	32400	46400	39600	2640	9570	3540	2480	7950	3020	6990	27100	4700	9	9	9	9	9	9	12800	12900	13700	10900
mws0376	115	1.61	116.006	C4H4O4	[M-H]-	Fumaric acid	Organic acids	Organic acids	9	9	9	9	9	9	1240000	58300	731000	278000	118000	539000	204000	191000	146000	83300	95300	117000	216000	168000	140000	133000
mws0383	267.23	10.47	268.219	C17H32O2	[M-H]-	Cis-10-Heptadecenoic Acid	Lipids	Free fatty acids	2220000	1080000	1300000	1100000	818000	957000	986000	1610000	884000	1680000	1410000	1220000	1070000	953000	1100000	1030000	1000000	811000	1380000	1470000	1430000	1110000
mws0396	281.25	11.11	282.234	C18H34O2	[M-H]-	Elaidic Acid	Lipids	Free fatty acids	26400000	14300000	21700000	19300000	17100000	19700000	24600000	17400000	25900000	21000000	27100000	26900000	49200000	47500000	53600000	43800000	38400000	24600000	32600000	32400000	37300000	28600000
mws0425	129	2.15	130.021	C5H6O4	[M-H]-	Citraconic acid	Organic acids	Organic acids	47500	31700	49600	50300	59300	54400	33600	43700	29000	34300	35600	40800	36600	39000	47600	34100	34100	16500	38900	40800	38700	39100
mws0437	151.15	1.23	152.058	C5H12O5	[M-H]-	D-Arabitol	Others	Saccharides and Alcohols	9	9	9	9	9	9	171000	5400	100000	27300	14100	94300	26200	31700	28800	18300	15200	18100	36600	35900	30200	21400
mws0458	151.05	4.47	152.041	C8H8O3	[M-H]-	Vanillin	Phenolic acids	Phenolic acids	80800	119000	95000	83400	96400	116000	1200000	886000	980000	1300000	1500000	2200000	124000	179000	164000	240000	131000	151000	443000	425000	361000	288000
mws0467	165.06	4.34	166.055	C9H10O3	[M-H]-	3-(4-Hydroxyphenyl)-propionic acid	Phenolic acids	Phenolic acids	44300	35100	34000	34200	24900	24000	63900	16300	49000	22400	30200	52200	32900	28500	28300	40900	35900	30600	40500	43700	24600	42800
mws0470	117.02	1.82	118.021	C4H6O4	[M-H]-	Methylmalonic acid	Organic acids	Organic acids	2360000	2100000	2480000	1440000	1800000	1470000	4510000	456000	2680000	1060000	1040000	1480000	2360000	2770000	3130000	1810000	1250000	1620000	1690000	1870000	1670000	1810000
mws0473	131.04	2.58	132.035	C5H8O4	[M-H]-	2-Methylsuccinic acid	Organic acids	Organic acids	22000	18800	17600	15700	13400	20000	89500	31800	60900	55500	44100	55300	12800	13700	13400	15000	14300	15600	17500	18300	16900	20600
mws0491	122.1	2.89	121.082	C8H11N	[M+H]+	Phenethylamine	Others	Others	20400	34200	13700	16300	43400	23200	6530	6780	7840	17600	26000	8920	2570	2310	5200	7630	10500	2530	17300	16200	13800	12500
mws0497	165.06	4.37	166.055	C9H10O3	[M-H]-	L-(-)-3-Phenyllactic acid	Organic acids	Organic acids	24500	22900	28000	14900	19400	21100	13300	4830	8010	7460	5790	7550	9040	9280	11100	8320	8670	13600	9496	14600	18700	13200
mws0520	224.1	3.13	223.074	C11H13NO4	[M+H]+	N-Acetyl-L-tyrosine	Amino acids and derivatives	Amino acids and derivatives	9	9	9	19200	9650	12300	6920	4910	4520	5430	3900	4860	3440	7430	5740	9	9	9	9460	6800	9870	9150
mws0567	146.09	1.27	145.076	C5H11N3O2	[M+H]+	4-Guanidinobutyric acid	Organic acids	Organic acids	139000	116000	133000	66500	60700	42700	148000	50800	65600	101000	113000	105000	156000	157000	145000	225000	172000	229000	112000	132000	110000	113000
mws0574	103.05	2.05	104.041	C4H8O3	[M-H]-	α-Hydroxyisobutyric acid	Organic acids	Organic acids	9	9	9	1050	1490	1530	2060	1280	916	968	1480	608	2130	1110	2330	2030	1610	833	1820	1380	1490	1790
mws0582	322.4	1.73	321.082	C11H19N3O6S	[M+H]+	S-(methyl)glutathione	Amino acids and derivatives	Amino acids and derivatives	2670	925	841	9	9	9	6270	849	558	3130	3110	2020	1200	2390	1190	339	299	451	949	1290	1290	1070
mws0596	154.04	3.17	153.036	C7H7NO3	[M+H]+	3-Hydroxyanthranilic acid	Organic acids	Organic acids	29600	30400	32000	12600	15000	10600	6100	7700	8140	7280	4980	6310	7420	5240	2640	6250	9790	4640	15300	12300	16900	15500
mws0609	344.2	1.87	345.033	C10H12N5O7P	[M-H]-	Guanosine 3',5'-cyclic monophosphate	Nucleotides and derivatives	Nucleotides and derivatives	15200	15800	16900	22600	56400	41500	203000	32000	96300	52700	77000	85400	33100	37000	58100	250000	140000	212000	66800	86600	76900	60000
mws0628	121.04	4.19	122.032	C7H6O2	[M-H]-	4-Hydroxybenzaldehyde	Phenolic acids	Phenolic acids	153000	122000	158000	97100	98200	72700	87800	294000	146000	523000	209000	243000	39100	56200	52900	76200	39200	49000	121000	151000	118000	115000
mws0749	137.03	3.55	138.026	C7H6O3	[M-H]-	4-Hydroxybenzoic acid	Phenolic acids	Phenolic acids	118000	98600	128000	137000	132000	149000	111000	50200	73300	138000	107000	95300	135000	142000	162000	115000	100000	125000	126000	112000	99300	84500
mws0847	150	1.53	149.063	C6H7N5	[M+H]+	1-Methyladenine	Nucleotides and derivatives	Nucleotides and derivatives	11100	8210	8420	5350	5870	5910	10300	4360	7110	6710	5300	6770	11100	11400	12500	18700	8440	7680	12000	9390	8230	6650
mws0851	143.11	7.49	166.086	C8H15NaO2	[M-Na]-	Sodium Valproate	Organic acids	Organic acids	1350000	1240000	1300000	2590000	2280000	2220000	2660000	5780000	3710000	8540000	3360000	4030000	2010000	1990000	2150000	1860000	2300000	2170000	3640000	3470000	3300000	2580000
mws0856	463	4.3	464.076	C21H20O12	[M-H]-	Spiraeoside	Flavonoids	Flavonols	1230000	1340000	647000	216000	598000	234000	9	9	9	9	9	9	26800	50400	35700	27900	8360	10700	312000	321000	326000	348000
mws0863	213	1.73	234.988	C5H9NaO7P	[M-Na]-	2-Deoxyribose 5-phosphate	Nucleotides and derivatives	Nucleotides and derivatives	9	9	9	9	9	9	108000	9	65500	20300	7370	38600	20300	18200	14000	10400	11700	14400	17500	18600	15900	18900
mws0866	259	1.19	260.016	C6H13O9P	[M-H]-	D-Glucose 6-phosphate	Others	Saccharides and Alcohols	4970	6750	6560	4710	11200	9350	340000	11800	111000	26100	35100	36400	31900	38800	33500	45500	24300	51000	43100	44800	34700	38900
mws0884	328.1	2.34	329.038	C10H12N5O6P	[M-H]-	Cyclic AMP	Nucleotides and derivatives	Nucleotides and derivatives	51900	31700	53500	73700	147000	81400	568000	63000	242000	77400	84100	224000	45400	69100	85400	160000	99000	133000	117000	124000	105000	120000
mws0885	153	3.35	154.021	C7H6O4	[M-H]-	2,4-Dihydroxy benzoic acid	Phenolic acids	Phenolic acids	9	9	9	9	9	9	9	9	9	9	9	9	248000	277000	632000	239000	146000	89100	84600	92300	95300	79900
mws0906	341	3.22	342.113	C16H22O8	[M-H]-	Coniferin	Phenolic acids	Phenolic acids	1040000	887000	803000	696000	568000	902000	77800	623000	200000	737000	672000	547000	344000	431000	489000	932000	713000	1200000	577000	623000	583000	674000
mws0911	269	4.82	270.044	C15H10O5	[M-H]-	Demethyltexasin	Flavonoids	Isoflavones	5980	1920	4500	3380	3480	3050	9	9	9	553	416	998	9	9	9	9	9	9	2620	3510	2290	2260
mws0913	447	4.49	448.082	C21H20O11	[M-H]-	Trifolin	Flavonoids	Flavonols	1050000	1380000	1770000	395000	395000	309000	1400	1720	3560	6880	2020	6790	55000	127000	65000	64000	31700	157000	606000	616000	530000	450000
mws0918	283	7.45	284.058	C16H12O5	[M-H]-	Prunetin	Flavonoids	Isoflavones	717	234	392	685	137	431	316	1580	804	1760	706	1150	9	287	637	749	580	1060	3510	2220	2840	1700
mws0923	200.05	3.07	199.032	C9H10ClNO2	[M+H]+	L-2-chlorophenylalanine	Amino acids and derivatives	Amino acids and derivatives	18200000	17400000	17200000	22100000	21800000	22300000	24500000	24500000	24300000	26500000	24800000	25100000	23900000	25100000	24600000	25000000	23700000	23400000	22100000	24800000	25100000	26100000
mws0976	243	1.7	244.058	C9H12N2O6	[M-H]-	β-Pseudouridine	Nucleotides and derivatives	Nucleotides and derivatives	17900	16800	25500	15700	17000	15700	89000	22600	43500	21200	16400	23200	45800	48400	49800	36200	39900	29800	31400	28100	25000	26300
mws0983	326.31	9.8	325.272	C20H39NO2	[M+H]+	N-Oleoylethanolamine	Others	Others	17400	16600	16600	6580	8820	8750	16200	16100	13500	12800	11700	15900	18000	17600	23000	18800	12400	11700	5310	9590	10700	12000
mws1013	177	3.69	178.021	C9H6O4	[M-H]-	Esculetin	Lignans and Coumarins	Coumarins	84000	70900	84800	77900	92800	59800	12300	26100	6940	39200	22300	38500	63800	72100	104000	186000	110000	87000	75200	73700	71600	62100
mws1014	209.2	4.07	208.029	C10H8O5	[M+H]+	Fraxetin	Lignans and Coumarins	Coumarins	39500	33200	43400	32300	34500	32600	7760	35100	29900	32900	45200	27700	9170	14000	14300	11700	5200	16300	27800	36400	22000	29700
mws1015	339.1	3.21	340.065	C15H16O9	[M-H]-	Esculin(6,7-DihydroxyCoumarin-6-glucoside)	Lignans and Coumarins	Coumarins	5370000	4770000	5730000	2310000	3240000	2420000	2660	18700	2990	13100	13200	18300	120000	153000	129000	167000	115000	306000	1700000	1860000	1660000	1870000
mws1060	267.08	1.93	268.068	C10H12N4O5	[M-H]-	9-(β-D-Arabinofuranosyl)hypoxanthine	Nucleotides and derivatives	Nucleotides and derivatives	62300	47600	45500	112	154	9	19900	9	26200	9800	10900	13700	150	270	265	20500	21900	14000	23300	21500	23400	18400
mws1066	579.2	4.55	580.152	C27H32O14	[M-H]-	Narirutin	Flavonoids	Dihydroflavone	48500	70000	76800	47400	28300	27800	9	9	9	9	9	9	4650	6520	5980	4710	2720	3540	30900	29000	21400	25700
mws1073	595.2	3.68	594.132	C27H30O15	[M+H]+	Apigenin 6,8-C-diglucoside	Flavonoids	Flavonoid	3420000	3130000	3440000	2410000	2190000	2300000	4180	7510	2990	3980	6790	5950	771000	787000	1250000	762000	576000	382000	900000	1380000	1360000	1350000
mws1080	341.1	1.25	342.096	C12H22O11	[M-H]-	Galactinol	Others	Saccharides and Alcohols	235000	312000	342000	283000	177000	256000	1150000	609000	1690000	871000	876000	809000	753000	956000	635000	384000	159000	836000	529000	566000	565000	482000
mws1090	259	1.28	260.016	C6H13O9P	[M-H]-	Glucose-1-phosphate	Others	Saccharides and Alcohols	4130	8910	6520	6090	12000	9050	344000	12500	108000	25300	28700	35500	34600	39800	35300	44600	23600	50300	47200	45000	39600	36700
mws1140	271.07	6.16	272.058	C15H12O5	[M-H]-	Naringenin chalcone(4,2',4',6'-Tetrahydroxychalcone)	Flavonoids	Chalcones	9	9	9	9	9	9	525	641	1290	1800	820	1260	9	9	9	188	336	280	2310	2890	2120	1850
mws1151	799.2	4.08	800.233	C36H48O20	[M-H]-	Cistanoside A	Phenolic acids	Phenolic acids	4870	5550	4770	12900	12200	9880	2010	2480	3280	9	9	9	9	9	9	9	9	9	3390	4020	3730	3600
mws1153	665.2	4.78	666.184	C31H38O16	[M-H]-	2'-Acetylacteoside	Phenolic acids	Phenolic acids	173000	320000	139000	1370000	1310000	970000	22800000	24600000	23700000	26200000	22700000	22100000	7590000	7520000	6950000	18700000	11100000	10300000	20000000	19100000	17700000	17400000
mws1155	181.2	1.28	182.067	C6H14O6	[M-H]-	Mannitol	Others	Saccharides and Alcohols	14400	7610	11100	26300	11900	12500	9	9	9	9	9	9	9	9	9	9	9	9	4350	3860	2820	3300
mws1167	131	1.37	132.001	C4H4O5	[M-H]-	Oxaloacetic acid	Organic acids	Organic acids	4410	7050	6860	7340	5750	4830	15100	8540	18400	15500	14800	25100	8520	6240	7020	7280	7760	5290	7660	6160	6030	7090
mws1189	193.1	1.26	194.033	C6H10O7	[M-H]-	D-Galacturonic acid(Gal A)	Organic acids	Organic acids	50400	53100	68100	46000	51800	57000	19800	27900	18400	25600	32300	24700	8720	11200	17500	22300	11800	15500	30000	25100	24500	28500
mws1200	177	6.03	178.055	C10H10O3	[M-H]-	Trans-4-Hydroxycinnamic Acid Methyl Ester	Phenolic acids	Phenolic acids	46800	49400	42000	27700	26900	22800	9	9	9	4680	5530	1970	4090	7140	5590	10700	5830	8170	18100	19500	15800	15300
mws1213	193.1	1.26	194.033	C6H10O7	[M-H]-	Aldehydo-D-galacturonate	Organic acids	Organic acids	53800	65300	91200	55900	66800	64700	18500	37500	23900	31800	28700	32100	9800	12300	19300	20400	24800	16400	29700	27600	31000	36500
mws1292	565.2	4.02	564.123	C26H28O14	[M+H]+	Isoschaftoside	Flavonoids	Flavonoid carbonoside	3100000	2450000	2550000	1570000	1440000	1490000	3340	6570	1150	1100	4990	3740	602000	790000	1140000	568000	506000	365000	824000	1120000	998000	1110000
mws1320	160.08	5.27	161.076	C10H11NO	[M-H]-	Tryptophol	Alkaloids	Plumerane	11100	6120	7590	5360	5320	3390	6680	2480	3300	1790	2160	3240	5940	7520	5780	3830	1640	6030	6330	6500	6050	4580
mws1329	463.09	4.5	464.076	C21H20O12	[M-H]-	Gossypitrin	Flavonoids	Flavonols	12900	14700	11900	6540	10600	7310	5790	4330	6590	5180	6110	6730	11300	7000	13600	6090	6080	8480	10800	11800	14950	10700
mws1333	341.12	1.23	342.096	C12H22O11	[M-H]-	Melibiose	Others	Saccharides and Alcohols	18700	26100	30100	16200	14000	14900	65200	30900	87400	46400	48000	48300	47300	50300	36700	23900	13900	42400	32400	36200	32800	32000
mws1336	138.05	3.24	137.042	C7H7NO2	[M+H]+	4-Aminobenzoic acid	Phenolic acids	Phenolic acids	217000	125000	190000	159000	209000	173000	46300	36000	18100	115000	91400	63700	119000	169000	332000	424000	547000	143000	166000	213000	193000	194000
mws1337	220.2	2.78	219.097	C9H17NO5	[M+H]+	D-Pantothenic Acid	Others	Vitamin	628000	586000	531000	605000	665000	621000	454000	702000	534000	676000	727000	666000	416000	515000	421000	501000	313000	614000	509000	593000	615000	640000
mws1349	302.3	6.49	301.272	C18H39NO2	[M+H]+	D-erythro-sphinganine	Alkaloids	Alkaloids	20900	26200	23400	65700	59000	98000	9	9	9	9	9	9	79000	66300	123000	184000	148000	66300	49400	49600	40700	44000
mws1354	193.06	4.59	194.049	C10H10O4	[M-H]-	Trans-ferulic acid	Phenolic acids	Phenolic acids	9	9	9	25300	32600	24200	48600	78200	50700	116000	75400	133000	248000	206000	342000	223000	119000	132000	98800	108000	98600	63800
mws1358	109.04	3.73	110.032	C6H6O2	[M-H]-	Pyrocatechol	Phenolic acids	Phenolic acids	9	9	9	8640	7080	4180	41500	9260	12200	13200	10700	40600	9930	13900	25200	43300	26500	15000	13100	15200	11900	12700
mws1482	237.19	7.42	236.162	C15H24O2	[M+H]+	Prehelminthosporol	Terpenoids	Sesquiterpenoids	42700	65200	49100	420000	492000	311000	434000	2550000	1220000	3700000	615000	1060000	13900	16000	17700	66100	13100	40300	456000	505000	448000	475000
mws1489	283.26	10.05	284.248	C18H36O2	[M-H]-	Stearic Acid	Lipids	Free fatty acids	75000000	66500000	61900000	77700000	74800000	74300000	43300000	37600000	28500000	40100000	35000000	36600000	81400000	78400000	89500000	83300000	81000000	74600000	70400000	75300000	80500000	63400000
mws1499	149.05	1.33	150.044	C5H10O5	[M-H]-	D-(-)-Arabinose	Others	Saccharides and Alcohols	35000	38800	45400	27400	34600	37100	23600	17300	22900	18900	20400	22500	8110	4760	7760	15600	12900	14400	13600	16300	18900	17400
mws1506	639.2	4.12	640.169	C29H36O16	[M-H]-	Plantamajoside	Phenolic acids	Phenolic acids	3590000	3360000	4440000	5540000	3540000	4790000	4570000	945000	2050000	2240000	3590000	2280000	2510000	1910000	2320000	2880000	3500000	4660000	3020000	3310000	3220000	3110000
mws1521	285.1	3.15	286.09	C13H18O7	[M-H]-	Salicin	Phenolic acids	Phenolic acids	7280	11800	10800	11100	7760	9570	3690	3060	4100	4140	4250	2670	44000	40800	36000	18500	11000	28200	11800	12200	15000	14300
mws1584	515.12	3.63	516.105	C25H24O12	[M-H]-	Cynarin	Phenolic acids	Phenolic acids	6490	2090	6910	1460	2800	2920	9	9	9	1160	978	440	9	2070	1440	9	9	9	2220	2370	1790	2770
mws1587	132.1	1.85	131.085	C6H13NO2	[M+H]+	α-Aminocaproic acid	Amino acids and derivatives	Amino acids and derivatives	5340000	3380000	4420000	2520000	4290000	2670000	14900000	1530000	4300000	2620000	3020000	3430000	5130000	6580000	4310000	3070000	2570000	3380000	4130000	4920000	4740000	4880000
mws1589	503.2	1.3	504.14	C18H32O16	[M-H]-	Panose	Others	Saccharides and Alcohols	9	9	9	9	9	9	11700	12500	14700	17100	25800	21600	23100	34200	10100	4800	4630	10900	8360	10300	7110	9140
mws1593	665.1	1.27	666.184	C24H42O21	[M-H]-	Maltotetraose	Others	Saccharides and Alcohols	900	1590	1610	9	9	9	1030	1010	2880	4690	7370	3300	9	9	9	9	9	9	1510	1500	1230	1170
mws1660	565.15	3.84	564.123	C26H28O14	[M+H]+	Schaftoside	Flavonoids	Flavonoid carbonoside	19100	14000	15500	10300	8100	6100	9	9	9	9	9	9	1970	5910	5930	3180	3560	2490	3990	5970	5890	5910
mws1661	609.18	4.65	608.146	C28H32O15	[M+H]+	Diosmin	Flavonoids	Flavonoid	3820000	4300000	5320000	774000	868000	752000	14600	4030	4430	11300	24500	13000	6740000	8200000	8250000	6490000	2870000	4210000	2200000	3080000	2450000	2630000
mws1709	133	0.88	134.015	C4H6O5	[M-H]-	Malic acid	Organic acids	Organic acids	1900000	1820000	2950000	1770000	1710000	1380000	2910000	411000	2030000	852000	925000	1700000	2670000	2900000	2380000	1700000	1430000	1780000	1580000	1770000	1660000	1770000
mws1711	118.15	1.34	117.07	C5H11NO2	[M+H]+	D-(-)-Valine	Amino acids and derivatives	Amino acids and derivatives	203000	144000	159000	138000	157000	118000	816000	133000	313000	216000	215000	261000	366000	464000	345000	295000	244000	290000	268000	276000	298000	240000
mws1712	166.19	2.42	165.07	C9H11NO2	[M+H]+	D-(+)-Phenylalanine	Amino acids and derivatives	Amino acids and derivatives	1040000	724000	615000	742000	1170000	744000	4570000	506000	1590000	1050000	1120000	1130000	2460000	2290000	3060000	2090000	2530000	1610000	1530000	1720000	1730000	1710000
mws2104	193.07	1.24	194.067	C7H14O6	[M-H]-	D-Pinitol	Others	Others	13700	17200	20100	10200	11000	17100	3070	7940	3870	6130	7490	12200	2690	2420	2560	3800	4550	4880	7470	8220	8450	7410
mws2108	353.1	3.42	354.079	C16H18O9	[M-H]-	Cryptochlorogenic acid	Phenolic acids	Phenolic acids	1860000	2050000	1630000	336000	508000	721000	9	9	9	9	9	9	1200000	1240000	1970000	650000	1030000	384000	766000	826000	804000	821000
mws2209	447.1	4.66	448.082	C21H20O11	[M-H]-	Astragalin	Flavonoids	Flavonols	201000	245000	227000	83500	136000	86500	1680	9350	3390	17800	5700	10800	45000	74500	124000	63800	56200	86100	152000	149000	117000	91500
mws2212	179.04	3.64	180.035	C9H8O4	[M-H]-	Caffeic acid	Phenolic acids	Phenolic acids	163000	123000	122000	365000	644000	459000	467000	873000	374000	997000	476000	1290000	166000	245000	491000	1650000	973000	330000	508000	556000	440000	370000
mws2471	303.05	4.79	303.04	C15H11O7	[M]+	Delphinidin chloride	Flavonoids	Anthocyanins	15600	18400	10200	18400	23300	20900	4990	6270	3890	3870	6840	6730	27500	27100	27200	39500	37000	22600	10100	14800	11000	9480
mws2523	421.1	1.19	422.06	C12H23O14P	[M-H]-	Trehalose 6-phosphate	Others	Saccharides and Alcohols	3390	3850	3730	1230	1200	1530	4820	3140	4970	2870	3570	2450	2000	2120	1620	2360	1980	3140	2680	2970	2260	3010
mws2608	222.1	1.32	221.077	C8H15NO6	[M+H]+	N-Acetyl-D-galactosamine	Others	Others	1070000	980000	947000	977000	970000	947000	1020000	1250000	1180000	1330000	967000	1190000	1340000	1250000	1280000	1340000	1220000	960000	1190000	1480000	1310000	1320000
mws2623	281.25	10.9	282.234	C18H34O2	[M-H]-	11-Octadecanoic acid(Vaccenic acid)	Lipids	Free fatty acids	6340000	2710000	5320000	4660000	4270000	4600000	6150000	3810000	6230000	4910000	6490000	6390000	12200000	12000000	13400000	11200000	9640000	5650000	8160000	7990000	8460000	7620000
mws2628	118.09	1.27	117.07	C5H11NO2	[M+H]+	N-Methyl-4-aminobutyric acid	Organic acids	Organic acids	1280	458	512	1760	577	914	1190	1440	1020	1240	631	1520	875	920	1670	790	1340	1340	1400	1020	1390	804
mws4017	285.22	10.2	286.21	C20H30O	[M-H]-	Ferruginol	Terpenoids	Ditepenoids	611000	539000	470000	685000	610000	607000	363000	303000	235000	307000	291000	320000	711000	680000	762000	730000	685000	682000	610000	643000	686000	506000
mws4085	223.07	4.51	224.058	C11H12O5	[M-H]-	Sinapic acid	Phenolic acids	Phenolic acids	9	9	9	9	9	9	9	9	9	5960	7990	5800	9	9	9	9	9	9	1830	2620	2310	1494
mws4163	665.2	1.35	666.184	C24H42O21	[M-H]-	1,1-Kestotetraose	Others	Saccharides and Alcohols	9	9	9	9	9	9	11500	16500	31400	24200	56600	43100	19800	32100	4960	6010	1240	40200	13100	12800	11000	16100
mws4169	479.15	4.5	478.125	C23H26O11	[M+H]+	Calceorioside B	Phenolic acids	Phenolic acids	17900000	17300000	11600000	14100000	22200000	17300000	14300000	27300000	20900000	24000000	22000000	23600000	7050000	8290000	11200000	12700000	10300000	8130000	10200000	13500000	14500000	14700000
mws4170	179.06	1.32	180.053	C6H12O6	[M-H]-	D-Glucose	Others	Saccharides and Alcohols	235000	234000	258000	138000	176000	184000	518000	120000	330000	176000	219000	220000	124000	138000	146000	116000	123000	113000	186000	218000	179000	178000
mws4174	222.09	1.3	221.077	C8H15NO6	[M+H]+	N-Acetyl-β-D-mannosamine	Others	Others	11800	13400	8150	8900	7640	10300	35000	10600	42900	21700	24400	17000	20500	26400	15200	14200	15700	29100	19500	20000	20000	13300
mws4175	175.03	1.39	176.024	C6H8O6	[M-H]-	D-Glucurono-6,3-lactone	Others	Others	5210	6820	9430	6080	7920	11700	7050	10500	7840	8410	7180	12200	4570	4340	6040	8340	7610	8130	7450	7890	5610	5560
mws5028	136.04	4.9	135.027	C7H5NO2	[M+H]+	2-Benzoxazolinone	Others	Others	284000	189000	399000	711000	370000	330000	3890000	328000	948000	1420000	1310000	3140000	1010000	974000	1330000	2230000	1510000	1150000	855000	1000000	764000	813000
mws5035	279.17	4.04	278.147	C15H22N2O3	[M+H]+	Leucylphenylalanine	Amino acids and derivatives	Amino acids and derivatives	11900	9190	12500	14700	25300	21000	93800	16000	57700	24900	39000	46800	102000	133000	242000	240000	149000	146000	57200	70800	67200	68300
mws5037	203.14	2.9	202.118	C9H18N2O3	[M+H]+	Alanylleucine	Amino acids and derivatives	Amino acids and derivatives	9	9	9	3620	8360	6210	9	9	9	9	9	9	9	9	9	9	9	9	2190	2650	2420	2220
mws5038	341.11	1.32	342.096	C12H22O11	[M-H]-	Isomaltulose	Others	Saccharides and Alcohols	10300	32100	34100	6950	5970	12700	140000	62900	200000	82800	111000	86700	90300	115000	74200	42400	19800	91100	63000	84500	57500	52300
mws5039	341.09	3.33	340.065	C15H16O9	[M+H]+	Esculin Hydrate	Lignans and Coumarins	Coumarins	5980000	5200000	5960000	3130000	4230000	2880000	2280	24000	5010	21000	13800	26200	202000	219000	198000	275000	163000	513000	1510000	2120000	2100000	2350000
mws5040	365.11	1.36	364.078	C12H21O11Na	[M+H]+	Turanose	Others	Saccharides and Alcohols	1600000	1960000	2000000	3250000	2080000	2980000	17200000	12600000	16800000	12700000	11200000	12300000	6850000	7840000	10700000	5890000	2340000	8580000	6240000	8780000	9380000	10400000
pmb0160	353.3	6.53	352.237	C21H36O4	[M+H]+	MAG(18:3)isomer5	Lipids	Glycerol ester	2140000	1260000	2050000	2010000	2010000	1790000	131000	21600	43000	46600	76500	115000	127000	150000	167000	638000	468000	422000	820000	1070000	930000	812000
pmb0164	355.1	7.38	354.251	C21H38O4	[M+H]+	MAG(18:2)isomer1	Lipids	Glycerol ester	245000	127000	185000	302000	248000	229000	53600	59600	35800	64500	149000	154000	26000	26300	22900	135000	89200	90000	116000	152000	98200	91700
pmb0296	357.2	7.8	356.265	C21H40O4	[M+H]+	MAG(18:1)isomer2	Lipids	Glycerol ester	191000	89000	186000	109000	115000	103000	82000	392000	157000	241000	603000	862000	28500	30600	30300	203000	129000	116000	124000	154000	132000	137000
pmb0374	136.1	2.39	135.049	C5H5N5	[M+H]+	Aminopurine	Alkaloids	Alkaloids	56000	38400	41800	76800	95700	92600	9	9	9	9	42900	9	86100	97600	133000	125000	112000	109000	101000	102000	78100	70700
pmb0423	193.1	3.69	194.049	C10H10O4	[M-H]-	Hydroxy-methoxycinnamate	Phenolic acids	Phenolic acids	9	9	9	9	9	9	9	9	9	6630	3400	5670	93300	67400	78700	45800	19900	32500	20000	17700	11500	12800
pmb0484	104.1	1.24	103.091	C5H13NO	[M+H]+	Choline	Alkaloids	Alkaloids	5100000	4570000	4950000	3340000	3030000	3010000	4530000	2760000	3910000	3320000	3190000	3380000	4860000	4950000	5170000	4830000	4790000	4770000	3500000	4110000	3920000	3820000
pmb0530	664.2	1.64	663.08	C21H27N7O14P2	[M+H]+	Nicotinic acid adenine dinucleotide	Nucleotides and derivatives	Nucleotides and derivatives	6130	6170	5390	3030	3780	2150	2300	4550	2910	13400	8340	3060	3130	5260	2920	2400	3220	4160	6040	6080	4960	4410
pmb0550	449.1	3.06	449.089	C21H21O11	[M]+	Cyanidin 3-O-glucoside(Kuromanin)	Flavonoids	Anthocyanins	9	9	9	8170	6430	6180	19800	18500	22900	27200	29200	28000	9	9	9	16800	24200	14400	28000	21700	18400	14900
pmb0626	757.1	3.44	756.175	C33H40O20	[M+H]+	6-C-Hexosyl-apigenin O-hexosyl-O-hexoside	Flavonoids	Flavonoid carbonoside	1760	1360	1970	1990	2310	1330	684	3460	878	2930	2830	1250	9	9	9	9	9	9	1460	2110	1690	2610
pmb0645	627.1	3.87	626.155	C28H34O16	[M+H]+	6-C-Hexosyl-hesperetin O-hexoside	Flavonoids	Flavonoid carbonoside	9	9	9	9	9	9	9	9	9	9	9	9	28400	30000	25300	16600	12200	15200	6710	6410	6830	6580
pmb0652	565.1	4.05	564.123	C26H28O14	[M+H]+	C-Hexosyl-apigenin O-pentoside	Flavonoids	Flavonoid carbonoside	41000	30100	53500	26400	24500	26600	9	9	9	9	9	9	13900	12700	16000	12800	6240	6100	16500	14800	14200	18300
pmb0665	611.2	4.17	610.126	C27H30O16	[M+H]+	Luteolin 8-C-hexosyl-O-hexoside	Flavonoids	Flavonoid	20100	18800	18700	9910	8520	8850	44600	38900	41600	52100	41100	71600	11100	21400	19400	27600	81800	34100	44700	69800	74500	47800
pmb0736	493.1	4.74	492.105	C23H24O12	[M+H]+	Tricin 7-O-hexoside	Flavonoids	Flavonoid	432000	531000	645000	95200	132000	83200	9	9	9	10700	24300	21900	928000	937000	688000	445000	147000	481000	316000	380000	291000	241000
pmb0764	144.1	3.12	143.033	C6H9NOS	[M+H]+	4-Methyl-5-thiazoleethanol	Others	Others	9920	10500	12600	14400	13400	10800	6240	24700	3700	8730	1720	14000	4840	10200	8650	25900	12200	10900	9830	10600	12300	12800
pmb0801	346	2.07	345.089	C14H19NO9	[M+H]+	4-Pyridoxic acid O-hexoside	Others	Vitamin	368000	315000	427000	70700	82600	65100	9	39000	8820	32000	26000	25400	26700	42600	34500	37800	15500	9	52200	82200	96700	105000
pmb0854	518.3	6.94	517.282	C26H48NO7P	[M+H]+	LysoPC 18:3	Lipids	LPC	25900000	16600000	32500000	50200000	50400000	38100000	25600000	1790000	6510000	8090000	14400000	13600000	3220000	3390000	5180000	23600000	21700000	12700000	21200000	24900000	20600000	19300000
pmb0855	496.3	7.74	495.296	C24H50NO7P	[M+H]+	LysoPC 16:0	Lipids	LPC	2860000	3540000	4670000	2750000	3780000	3120000	11600000	3400000	7850000	5550000	4120000	5420000	4570000	6170000	4840000	4000000	2620000	5910000	3690000	4400000	3910000	3890000
pmb0856	480.31	7.8	479.268	C23H46NO7P	[M+H]+	LysoPE 18:1(2n isomer)	Lipids	LPE	5300000	2300000	4740000	5810000	6610000	8080000	9180000	9210000	13500000	11000000	28800000	24500000	5140000	5600000	7700000	26100000	16500000	11500000	8070000	9860000	10500000	11000000
pmb0863	492.3	6.29	491.268	C24H46NO7P	[M+H]+	LysoPC 16:2(2n isomer)	Lipids	LPC	26400	13500	23900	128000	116000	122000	255000	18700	55100	89900	139000	108000	10800	12100	23900	99700	109000	38400	63200	72500	61800	53200
pmb0865	518.2	6.67	517.282	C26H48NO7P	[M+H]+	LysoPC 18:3(2n isomer)	Lipids	LPC	33900000	16100000	54600000	51800000	71000000	78700000	26900000	1860000	6570000	8520000	15100000	13900000	3430000	3460000	6610000	23900000	22000000	13300000	21300000	25400000	26600000	28300000
pmb0874	478.6	7.32	477.253	C23H44NO7P	[M+H]+	LysoPE 18:2(2n isomer)	Lipids	LPE	87600	44400	60700	144000	144000	164000	224000	88000	119000	210000	363000	332000	79900	90000	115000	310000	358000	204000	119000	158000	137000	146000
pmb0876	454.2	7.68	453.253	C21H44NO7P	[M+H]+	LysoPE 16:0	Lipids	LPE	242000	338000	352000	285000	398000	378000	2020000	802000	1640000	1300000	1100000	1370000	658000	679000	489000	437000	290000	686000	479000	644000	592000	614000
pmb0889	279.3	7.91	278.205	C18H30O2	[M+H]+	Punicic acid	Lipids	Free fatty acids	398000	290000	463000	314000	301000	281000	1930000	408000	828000	568000	918000	860000	3590000	3130000	5750000	1940000	3950000	1340000	982000	1370000	1210000	1390000
pmb0890	355.1	9.45	354.251	C21H38O4	[M+H]+	MAG(18:2)	Lipids	Glycerol ester	1650000	945000	1930000	1970000	1900000	2010000	2130000	720000	1300000	647000	874000	2250000	1980000	2020000	2420000	3750000	3410000	2860000	1030000	1760000	1900000	2130000
pmb0981	348.2	1.64	347.047	C10H14N5O7P	[M+H]+	Adenosine 5'-monophosphate	Nucleotides and derivatives	Nucleotides and derivatives	13100	23600	10800	11300	12500	10700	9600	8360	5140	7730	7400	14600	13400	12700	17000	17200	15800	13400	11300	12500	15100	14300
pmb0998	364.1	1.65	363.042	C10H14N5O8P	[M+H]+	Guanosine 5'-monophosphate	Nucleotides and derivatives	Nucleotides and derivatives	2290	1330	9	5180	9220	9160	19100	2410	8310	2460	7030	13600	12500	25300	17900	26400	19000	51100	9980	15200	13200	11000
pmb1096	118	2.97	117.053	C8H7N	[M+H]+	Indole	Alkaloids	Plumerane	212000	217000	207000	266000	245000	242000	1160000	265000	561000	347000	347000	335000	499000	525000	664000	380000	325000	329000	349000	406000	396000	408000
pmb1605	353.3	7.55	352.237	C21H36O4	[M+H]+	MAG(18:3)isomer3	Lipids	Glycerol ester	3590000	2410000	4860000	4120000	4120000	3840000	246000	40900	100000	82500	155000	190000	405000	409000	480000	1490000	1230000	1020000	2050000	2850000	2230000	2100000
pmb1656	353.1	8.85	352.237	C21H36O4	[M+H]+	MAG(18:3)isomer4	Lipids	Glycerol ester	158000	86200	175000	119000	131000	100000	25600	5240	9880	5520	7140	19400	27600	25800	30400	65100	50900	46900	45500	75200	69100	66000
pmb2211	343.1	7.03	342.262	C19H38N2O3	[M+H]+	Cocamidopropyl betaine	Alkaloids	Alkaloids	149000	29300	34500	31700	43300	19500	139000	90800	76300	97400	117000	79900	31600	19300	11400	18900	87200	28400	37100	43000	31100	37700
pmb2221	318.3	6.82	317.266	C18H39NO3	[M+H]+	4-Hydroxysphinganine	Lipids	Sphingolipids	91800	100000	98200	224000	195000	228000	249000	70000	114000	158000	131000	139000	71000	70800	96400	148000	171000	104000	102000	107000	102000	86800
pmb2260	480.31	6.66	479.268	C23H46NO7P	[M+H]+	LysoPC 15:1	Lipids	LPC	1570	9	9	16300	13400	15200	62200	2570	12400	21600	75500	58000	3990	3080	7510	39000	37100	10800	17600	18900	16400	10400
pmb2319	482.3	7.2	481.282	C23H48NO7P	[M+H]+	LysoPC 15:0	Lipids	LPC	67300	106000	117000	108000	156000	118000	295000	196000	271000	199000	155000	167000	125000	174000	129000	117000	67200	195000	117000	128000	117000	112000
pmb2325	353.1	7.33	352.237	C21H36O4	[M+H]+	MAG(18:3)isomer2	Lipids	Glycerol ester	304000	197000	303000	222000	253000	256000	12500	1670	3830	3440	5820	8150	13800	18400	21500	60000	51200	39800	79200	109000	130000	137000
pmb2363	357.2	7.69	356.265	C21H40O4	[M+H]+	MAG(18:1)isomer1	Lipids	Glycerol ester	159000	88400	205000	105000	103000	94200	76000	412000	153000	208000	525000	761000	26500	27900	30900	204000	102000	110000	120000	162000	129000	130000
pmb2406	510.1	8.29	509.311	C25H52NO7P	[M+H]+	LysoPC 17:0	Lipids	LPC	58600	80700	80200	40700	60300	52600	141000	169000	155000	127000	119000	136000	52300	86400	53300	61900	34300	94300	52100	75100	62400	65700
pmb2444	353.2	9	352.237	C21H36O4	[M+H]+	MAG(18:3)isomer1	Lipids	Glycerol ester	3890000	1950000	4180000	3170000	3230000	2280000	644000	132000	240000	147000	187000	498000	767000	663000	773000	1710000	1340000	1270000	1220000	1950000	1690000	1630000
pmb2591	245	4.33	246.089	C13H14N2O3	[M-H]-	Acetyltryptophan	Amino acids and derivatives	Amino acids and derivatives	2010	5530	3280	7830	10600	6910	1280000	9620	341000	97000	72900	99800	44300	50000	97100	128000	68300	59900	118000	100000	91500	86100
pmb2640	199	8.62	200.162	C12H24O2	[M-H]-	Lauric acid	Lipids	Free fatty acids	9	9	9	5500	5180	5760	7380	9290	7960	13800	10400	9230	6750	7310	6380	9200	8120	8460	10200	10500	8160	5900
pmb2778	295	7.92	296.214	C18H32O3	[M-H]-	9,10-EODE	Lipids	Free fatty acids	379000	268000	359000	404000	360000	308000	1490000	378000	693000	659000	890000	784000	4250000	3630000	6930000	2720000	4930000	1570000	1600000	1650000	1860000	1710000
pmb2786	293	7.37	294.199	C18H30O3	[M-H]-	9-HOTrE	Lipids	Free fatty acids	88700	59000	82600	93200	93500	69200	42500	6910	13300	14600	17300	15000	511000	392000	820000	313000	481000	163000	173000	166000	170000	158000
pmb2787	293.2	8.12	294.199	C18H30O3	[M-H]-	9-KODE	Lipids	Free fatty acids	9670	3820	7300	7790	8850	3330	6980	1770	3900	3620	4160	3720	28800	34900	32700	15900	20700	8970	10300	10600	12800	14900
pmb2792	293	6.77	294.199	C18H30O3	[M-H]-	13-HOTrE(r)	Lipids	Free fatty acids	60700	29700	34500	168000	110000	108000	25600	20100	23800	33700	21800	24800	93100	70900	65500	36900	100000	72200	91400	86300	74100	65400
pmb2799	295	8.7	296.214	C18H32O3	[M-H]-	12,13-EODE	Lipids	Free fatty acids	4130	2180	4110	4930	4280	4030	15200	4850	7110	7400	12200	13100	31600	30500	49600	35600	38100	12500	15000	19500	14800	11000
pmb2871	315.1	2.4	316.065	C13H16O9	[M-H]-	2,5-Dihydroxy benzoic acid O-hexside	Phenolic acids	Phenolic acids	328000	368000	348000	206000	197000	245000	136000	164000	162000	230000	598000	180000	1030000	843000	585000	264000	190000	617000	296000	361000	370000	354000
pmb2936	591.1	5.38	592.152	C28H32O14	[M-H]-	Disinapoyl hexoside	Phenolic acids	Phenolic acids	8650	11500	2280	4240	10500	10500	9	9	9	1650	1850	1400	9	2320	625	9	9	9	3020	3860	3080	2160
pmb2957	465.1	3	466.073	C24H18O10	[M-H]-	Cyanidin O-syringic acid	Flavonoids	Anthocyanins	16900	19100	18700	18400	16500	16500	36000	9	21200	9	9	9	136000	106000	115000	29600	27400	47900	39100	38700	36100	34100
pmb2979	549.2	4.49	550.108	C25H26O14	[M-H]-	Hesperetin O-malonylhexoside	Flavonoids	Dihydroflavonol	101000	80500	9	34900	41900	51800	9	9	9	20200	19600	12300	9	9	3540	9	4840	9	66000	41100	34300	33400
pmb2992	459.1	4.21	460.082	C22H20O11	[M-H]-	Acacetin-O-glucuronic acid	Flavonoids	Flavonoid	28400	22600	31800	21800	18200	17400	9	9	9	9	9	9	9	9	9	9	9	9	6780	14300	18600	14800
pmb3007	475.1	4.65	476.076	C22H20O12	[M-H]-	Chrysoeriol O-glucuronic acid	Flavonoids	Flavonoid	1900000	1890000	2040000	1250000	1270000	1400000	9	9	9	9	9	9	2490	27800	101000	5230	31200	19900	1110000	1080000	892000	769000
pmb3012	461.1	4.73	462.096	C22H22O11	[M-H]-	Chrysoeriol 7-O-hexoside	Flavonoids	Flavonoid	146000	203000	184000	67400	87800	70800	9	9	9	24500	4750	12200	627000	714000	990000	303000	234000	190000	237000	235000	231000	217000
pmb3024	447.1	3.87	448.082	C21H20O11	[M-H]-	Luteolin C-hexoside	Flavonoids	Flavonoid	9	9	9	9	9	9	2710	15400	11200	10700	6640	9680	2740	3670	3540	4170	2230	2880	1540	2350	1420	2560
pmb3041	521.1	4.24	522.08	C23H22O14	[M-H]-	Tricin O-saccharic acid	Flavonoids	Flavonoid	905000	959000	859000	405000	425000	465000	24000	209000	88400	187000	175000	184000	175000	187000	173000	147000	129000	217000	410000	453000	388000	368000
pmb3042	491.1	4.44	492.105	C23H24O12	[M-H]-	Tricin 5-O-hexoside	Flavonoids	Flavonoid	20900	20900	14600	21700	23100	18300	7180	45200	27900	69300	63200	54500	9	3850	1460	3650	2580	5230	20200	18200	17900	21300
pmb3043	637.1	4.48	638.155	C29H34O16	[M-H]-	Tricin 5-O-rutinoside	Flavonoids	Flavonoid	14800	8810	13000	6010	9150	7120	9	9	9	9	9	9	154000	140000	74900	58700	18100	61700	31500	30600	24900	22100
pmb3053	523.1	6.45	524.111	C27H24O11	[M-H]-	Tricin O-eudesmic acid	Flavonoids	Flavonoid	9	9	9	9	9	9	9	9	9	9	9	9	2720	2240	2380	3440	1780	9	1690	1230	1180	1656
pmb3061	499.1	2.68	500.128	C22H28O13	[M-H]-	5-O-p-Coumaroyl quinic acid O-hexoside	Phenolic acids	Phenolic acids	17100	19100	15300	9	9	9	9	9	9	9	9	9	9	9	9	9	9	9	3280	2940	3240	3130
pmb3064	499.2	2.95	500.128	C22H28O13	[M-H]-	3-O-p-coumaroyl quinic acid O-hexoside	Phenolic acids	Phenolic acids	11900	8720	4840	3150	5740	4930	3620	7480	4020	4670	2600	5090	766	244	2310	2030	709	1340	4069	5030	3140	5010
pmb3068	337.1	3.34	338.085	C16H18O8	[M-H]-	1-O-p-Coumaroyl quinic acid	Phenolic acids	Phenolic acids	601000	566000	399000	58600	68900	145000	9	9	9	9	9	9	29400	13200	40500	11800	35000	4550	135000	148000	127000	131000
pmb3074	337.1	3.96	338.085	C16H18O8	[M-H]-	3-O-p-Coumaroyl quinic acid	Phenolic acids	Phenolic acids	1180000	1020000	774000	72700	101000	142000	9	9	9	9	9	9	33000	25300	59100	46500	64600	21200	226000	271000	252000	265000
pmb3107	359.1	2.84	360.088	C15H20O10	[M-H]-	Syringic acid O-glucoside	Phenolic acids	Phenolic acids	952000	1080000	1100000	1270000	957000	1400000	790000	1910000	1040000	1620000	2170000	1660000	3000000	3280000	3780000	3600000	2830000	3400000	1700000	1920000	1780000	1970000
pmb3894	329.1	6.36	330.061	C17H14O7	[M-H]-	Di-O-methylquercetin	Flavonoids	Flavonols	82500	56300	85800	70400	76400	98100	300000	182000	195000	222000	276000	260000	289000	251000	501000	287000	362000	143000	225000	225000	215000	209000
pmd0130	468.3	6.5	467.268	C22H46NO7P	[M+H]+	LysoPC 14:0(2n isomer)	Lipids	LPC	14000	8900	14700	34700	38500	41600	25400	9210	9040	19200	35500	33300	2780	3130	4320	26300	23300	9930	19200	20900	16000	14500
pmd0132	496.33	7.57	495.296	C24H50NO7P	[M+H]+	LysoPC 16:0(2n isomer)	Lipids	LPC	790000	442000	709000	1420000	1440000	1800000	5750000	884000	1620000	2280000	4860000	4740000	416000	405000	624000	4020000	3800000	1330000	1690000	1890000	1470000	1160000
pmd0136	524.36	8.69	523.325	C26H54NO7P	[M+H]+	LysoPC 18:0	Lipids	LPC	53000	25300	47300	58400	62100	79700	324000	75100	120000	148000	346000	320000	35900	39300	64400	206000	188000	71000	75900	107000	85300	73600
pmd0160	452.3	7.55	453.253	C21H44NO7P	[M-H]-	LysoPE 16:0(2n isomer)	Lipids	LPE	114000	153000	137000	203000	243000	213000	1290000	505000	933000	935000	784000	879000	484000	512000	352000	406000	249000	532000	519000	596000	496000	362000
pme0001	609.2	4.53	610.16	C28H34O15	[M-H]-	Hesperetin 7-O-neohesperidoside(Neohesperidin)	Flavonoids	Dihydroflavone	13200	13200	19200	6300	4970	6600	9	9	9	9	9	9	39900	84000	60300	44400	15200	27100	25200	26500	21300	26840
pme0006	116.1	1.29	115.056	C5H9NO2	[M+H]+	L-Proline	Amino acids and derivatives	Amino acids and derivatives	1060000	1400000	908000	248000	503000	276000	2360000	3710000	1650000	2830000	2090000	2830000	8730000	10600000	9400000	2910000	2030000	2780000	2760000	3110000	3100000	2710000
pme0033	137	1.63	136.033	C5H4N4O	[M+H]+	Hypoxanthine	Nucleotides and derivatives	Nucleotides and derivatives	66600	50600	76400	54200	76100	48300	68500	21200	31400	32500	38500	42200	71300	52900	71900	69600	48100	54100	53500	52500	63700	53300
pme0040	136.1	1.62	135.049	C5H5N5	[M+H]+	Adenine	Nucleotides and derivatives	Nucleotides and derivatives	10600000	8130000	11300000	9670000	9980000	8260000	13900000	3440000	7530000	5440000	6140000	6760000	11800000	12500000	14300000	13400000	10900000	10300000	9840000	10600000	10700000	10000000
pme0109	212.2	1.72	211.074	C10H13NO4	[M+H]+	(-)-3-(3,4-Dihydroxyphenyl)-2-methylalanine	Amino acids and derivatives	Amino acids and derivatives	3810	3820	1900	2340	1660	2270	1150	1530	2100	961	1050	1430	724	2640	1340	2140	9	1160	1060	1890	1310	1080
pme0120	118.2	1.3	117.07	C5H11NO2	[M+H]+	5-Aminovaleric acid	Amino acids and derivatives	Amino acids and derivatives	4020	6430	4400	3790	6640	4630	5100	5130	7630	8590	3650	7500	5400	4560	8240	7530	6550	10600	6830	9970	8260	12000
pme0122	189.2	1.52	188.103	C8H16N2O3	[M+H]+	N6-Acetyl-L-lysine	Amino acids and derivatives	Amino acids and derivatives	9650	11000	8810	8590	19900	9620	226000	59500	150000	70000	64600	70800	31400	45600	29700	37500	20300	32400	63000	59500	58600	52300
pme0124	173.2	1.29	172.075	C7H12N2O3	[M+H]+	Glycyl-L-proline	Amino acids and derivatives	Amino acids and derivatives	996	1610	9	1650	1860	1340	5080	2510	1660	1850	4130	1180	4450	6200	5130	3580	251	3960	2980	3260	2100	1920
pme0170	217.1	1.62	216.108	C8H16N4O3	[M+H]+	N-α-Acetyl-L-arginine	Amino acids and derivatives	Amino acids and derivatives	2660	7250	4460	6460	7530	2800	4010	6720	4260	9760	9740	8560	1960	13400	3890	5590	5250	9540	8470	9350	9270	9470
pme0181	170.1	1.22	169.076	C7H11N3O2	[M+H]+	1-Methylhistidine	Amino acids and derivatives	Amino acids and derivatives	42300	35500	40800	23000	32100	29800	4570	5030	9860	27100	20800	12100	37100	37900	31100	34300	36800	55800	22700	24900	22800	32400
pme0183	152.1	1.35	151.043	C5H5N5O	[M+H]+	2-Hydroxy-6-aminopurine	Nucleotides and derivatives	Nucleotides and derivatives	26200	24700	35000	20400	26800	21400	50200	13400	25600	19400	30900	28400	61800	74700	92100	69600	66700	61300	42300	42400	47500	44400
pme0257	111.03	1.5	112.023	C4H4N2O2	[M-H]-	Uracil	Nucleotides and derivatives	Nucleotides and derivatives	84400	78500	86600	61600	60900	61700	102000	101000	101000	105000	97600	95100	69500	69400	50700	68800	74700	74100	87400	75100	68800	57900
pme0264	243.09	2.58	242.078	C10H14N2O5	[M+H]+	Thymidine	Nucleotides and derivatives	Nucleotides and derivatives	14800	13200	14300	13800	14700	15200	89700	22200	56600	36400	84400	42800	98300	107000	107000	85300	69800	64300	46600	60200	58700	55900
pme0274	132.09	1.5	131.085	C6H13NO2	[M+H]+	6-Aminocaproic acid	Organic acids	Organic acids	464000	304000	325000	245000	335000	256000	4660000	383000	1720000	645000	565000	773000	809000	1180000	720000	615000	384000	622000	818000	900000	855000	850000
pme0282	165.03	3.48	166.021	C8H6O4	[M-H]-	Phthalic acid	Organic acids	Organic acids	214000	219000	235000	84000	97800	104000	16600	30200	16300	115000	69900	33100	72300	71600	81600	64500	61100	75100	85600	94400	90200	85100
pme0369	593.16	4.29	594.132	C27H30O15	[M-H]-	Kaempferol 3-O-rutinoside(Nicotiflorin)	Flavonoids	Flavonols	1520000	1850000	1850000	307000	461000	320000	9	9	9	9	9	9	366000	640000	644000	363000	228000	296000	615000	627000	586000	550000
pme0490	124	1.61	123.027	C6H5NO2	[M+H]+	Nicotinic acid	Others	Vitamin	308000	203000	245000	122000	151000	84400	56000	29900	41900	37300	38200	67100	139000	171000	232000	142000	102000	111000	128000	137000	139000	139000
pme0516	179.16	1.24	180.053	C6H12O6	[M-H]-	Inositol	Others	Saccharides and Alcohols	155000	152000	196000	118000	136000	151000	301000	78300	169000	153000	185000	148000	52100	45600	57400	100000	104000	94000	107000	133000	113000	118000
pme0519	341	1.28	342.096	C12H22O11	[M-H]-	D-(+)-Sucrose	Others	Saccharides and Alcohols	94300	129000	114000	99200	83300	104000	469000	249000	608000	332000	326000	335000	266000	360000	251000	144000	57100	290000	196000	231000	173000	179000
pme0534	195.16	1.2	196.047	C6H12O7	[M-H]-	Gluconic acid	Others	Saccharides and Alcohols	198000	192000	210000	120000	121000	133000	136000	78900	93000	91800	142000	103000	131000	202000	54700	83000	84400	198000	98800	111000	97500	118000
pme1002	138.08	1.7	137.076	C8H11NO	[M+H]+	L-Tyramine	Amino acids and derivatives	Amino acids and derivatives	7110	138000	75100	5330	11500	15800	76900	70500	128000	158000	398000	198000	28000	29400	47000	23100	74100	19800	82600	79300	77300	74300
pme1109	152	1.65	151.043	C5H5N5O	[M+H]+	Guanine	Nucleotides and derivatives	Nucleotides and derivatives	196000	173000	230000	208000	310000	186000	396000	228000	356000	217000	256000	382000	954000	996000	1420000	938000	656000	815000	516000	533000	581000	554000
pme1137	140	1.93	139.022	C6H5NO3	[M+H]+	6-Hydroxynicotinic acid	Alkaloids	Alkaloids	77600	33600	24500	15400	20100	18900	34600	24200	23500	131000	161000	97000	5250	9540	5240	6620	11600	12500	45700	39900	37300	31100
pme1173	137	1.87	136.033	C5H4N4O	[M+H]+	Allopurinol	Nucleotides and derivatives	Nucleotides and derivatives	51700	38600	42400	44000	46500	32500	42000	13100	26600	25700	27000	26800	38700	35800	45100	40100	34600	32500	36300	39500	35800	34700
pme1178	284.09	1.96	283.078	C10H13N5O5	[M+H]+	Guanosine	Nucleotides and derivatives	Nucleotides and derivatives	1710000	1150000	2080000	9	9	9	3760000	273000	1350000	985000	513000	1280000	1970000	1420000	1650000	1870000	2370000	1430000	440000	1480000	1880000	1790000
pme1187	257.08	2.33	258.072	C10H14N2O6	[M-H]-	5-Methyluridine	Nucleotides and derivatives	Nucleotides and derivatives	994	1660	1790	2200	1750	1460	1130	1140	1150	1110	761	698	9	9	9	461	524	1280	997	927	949	1270
pme1210	150	1.68	149.042	C5H11NO2S	[M+H]+	L-Methionine	Amino acids and derivatives	Amino acids and derivatives	51800	39300	38400	43300	66600	37100	157000	27200	87100	42500	42900	62800	164000	177000	197000	130000	90900	102000	101000	92100	89500	79200
pme1261	206.13	2.79	205.117	C9H19NO4	[M+H]+	Pantothenol	Others	Saccharides and Alcohols	136000	14900	10100	3920	7960	5150	24200	14300	10600	37900	53400	32800	322	350	1220	2290	2400	3850	27000	31900	33400	30200
pme1286	385	1.81	384.103	C14H20N6O5S	[M+H]+	S-(5'-Adenosy)-L-homocysteine	Amino acids and derivatives	Amino acids and derivatives	9	9	9	9	9	9	4990	637	1450	1090	358	349	7650	11700	7160	6210	5990	3700	1950	2450	2130	2290
pme1383	170.1	1.61	169.065	C8H11NO3	[M+H]+	Pyridoxine	Others	Vitamin	90700	94000	97800	20200	24400	22800	149000	39400	122000	35600	48800	32400	83600	102000	171000	168000	196000	147000	93700	120000	83800	104000
pme1474	298	3.35	297.075	C11H15N5O3S	[M+H]+	5'-Deoxy-5'-(methylthio)adenosine	Nucleotides and derivatives	Nucleotides and derivatives	4620000	4300000	5430000	3610000	3240000	4370000	3590000	537000	1350000	1200000	1120000	1140000	4580000	3710000	3660000	4180000	3780000	5180000	2560000	3560000	3590000	3570000
pme1540	625.17	4.04	624.14	C28H32O16	[M+H]+	Isorhamnetin 3-O-neohesperidoside	Flavonoids	Flavonols	23200	17600	8350	17800	40400	23600	6100	99900	34900	66800	38300	45100	4560	7750	14700	17100	11700	11500	18600	26900	23600	22100
pme1598	463.13	4.31	464.111	C22H24O11	[M-H]-	Hesperetin 5-O-glucoside	Flavonoids	Dihydroflavonol	1150000	1350000	591000	229000	531000	236000	9	9	9	9	9	9	24900	9	9	22600	5410	14000	306000	322000	291000	286000
pme1605	593.16	4.16	594.132	C27H30O15	[M-H]-	Kaempferol 3-O-robinobioside(Biorobin)	Flavonoids	Flavonols	1560000	1810000	1990000	320000	397000	330000	9	9	9	9	9	9	431000	609000	680000	427000	259000	304000	665000	705000	619000	679000
pme1665	593.16	3.69	594.132	C27H30O15	[M-H]-	Isovitexin 7-O-glucoside(Saponarin)	Flavonoids	Flavonoid carbonoside	13900	16000	16800	15000	15300	13300	9	9	9	9	9	9	6630	8640	9830	5990	4960	3630	6550	6060	8590	6330
pme1738	138.07	1.31	137.064	C7H9N2O	[M+H]+	3-Carbamyl-1-methylpyridinium(1-Methylnicotinamide)	Others	Others	7740	4620	5410	9	9	9	9	9	9	9	9	9	9	9	9	9	9	9	2570	2650	2730	2440
pme1816	353	3.08	354.079	C16H18O9	[M-H]-	Neochlorogenic acid(5-O-Caffeoylquinic acid)	Phenolic acids	Phenolic acids	5760000	6430000	5130000	1230000	1500000	2830000	9	9	9	9	9	9	5520000	5240000	10600000	3720000	8740000	1480000	2980000	3220000	3040000	3180000
pme1936	114.06	1.07	113.052	C4H7N3O	[M+H]+	Creatinine	Organic acids	Organic acids	5540	4260	4230	8280	8490	6980	6930	7310	7130	6840	8510	6310	8860	5500	6590	7630	6800	10500	6300	6730	4070	6960
pme2019	149	1.27	150.044	C5H10O5	[M-H]-	DL-Arabinose	Others	Saccharides and Alcohols	89400	79300	106000	70200	83200	81700	80800	53300	58000	54500	66800	84800	19900	20600	19100	38900	49700	44700	44900	56200	47100	50500
pme2049	103	2.07	104.041	C4H8O3	[M-H]-	2-Hydroxybutanoic acid	Organic acids	Organic acids	8910	8720	7870	4630	4860	5530	5850	4760	5450	4580	5510	6030	6250	3770	6360	6460	4990	4780	5620	5430	5490	6430
pme2237	181.08	1.25	182.067	C6H14O6	[M-H]-	Dulcitol	Others	Saccharides and Alcohols	123000	49800	63700	166000	123000	73200	9	9	9	10200	10600	12300	9	9	9	10100	8610	9040	16900	13100	18600	18800
pme2266	245.09	3.82	244.075	C10H16N2O3S	[M+H]+	Biotin	Others	Vitamin	9	9	9	5150	4970	4650	6520	5320	3190	5200	5190	4880	9	9	9	1830	4050	1930	6310	5650	5920	6040
pme2268	138	1.29	137.042	C7H7NO2	[M+H]+	Trigonelline	Alkaloids	Alkaloids	326000	277000	219000	564000	592000	643000	9	9	8400	9	9	9	111000	93300	181000	27200	120000	21800	202000	227000	214000	191000
pme2482	139.1	3.51	138.026	C7H6O3	[M+H]+	Protocatechuic aldehyde	Flavonoids	Flavanols	94900	93900	123000	86700	81600	78400	73000	91800	47200	86500	99700	124000	43900	41100	63300	89100	72700	75700	78400	97400	87400	81500
pme2566	217	1.64	218.078	C8H14N2O5	[M-H]-	(5-L-Glutamyl)-L-amino acid	Amino acids and derivatives	Amino acids and derivatives	7390	5220	6990	1810	1700	1910	1120	2330	1910	2460	5240	3560	2740	1080	2220	9	9	9	3010	2540	1930	2360
pme2617	166	1.15	165.036	C5H11NO3S	[M+H]+	Methionine sulfoxide	Amino acids and derivatives	Amino acids and derivatives	130000	101000	99600	134000	132000	123000	132000	131000	129000	147000	158000	145000	117000	129000	120000	134000	123000	133000	119000	134000	125000	113000
pme2634	118	1.34	117.07	C5H11NO2	[M+H]+	DL-Norvaline	Amino acids and derivatives	Amino acids and derivatives	641000	443000	494000	403000	460000	357000	2460000	399000	955000	727000	624000	757000	1090000	1360000	1050000	848000	746000	871000	825000	864000	851000	765000
pme2693	131	1.22	130.1	C6H14N2O	[M+H]+	N-Acetylputrescine	Alkaloids	Alkaloids	1420	1110	1000	2080	1700	1750	1460	1580	1400	2370	1290	787	1160	1310	1290	1380	596	1760	1850	1890	1830	1720
pme2801	167	2.24	166.042	C6H6N4O2	[M+H]+	7-Methylxanthine	Nucleotides and derivatives	Nucleotides and derivatives	1800	1360	1750	2750	2760	9	4970	4050	3710	3710	3670	4000	4740	3730	3690	4530	3920	9	3510	3190	3920	3470
pme3007	403	1.18	403.985	C9H14N2O12P2	[M-H]-	Uridine 5’-diphosphate	Nucleotides and derivatives	Nucleotides and derivatives	3200	3080	3650	2680	2900	2410	6550	3150	5570	7510	6070	7240	6500	3010	3260	6190	4080	3120	4190	4170	3330	4040
pme3011	104.06	1.27	103.056	C4H9NO2	[M+H]+	γ-Aminobutyric acid	Organic acids	Organic acids	40400	37100	36400	22400	15700	32300	9940	20800	15400	19600	17900	20100	66900	42000	14500	14000	12000	26300	16600	20200	22500	16600
pme3017	104	1.24	103.056	C4H9NO2	[M+H]+	2-Aminoisobutyric acid	Amino acids and derivatives	Amino acids and derivatives	459000	411000	442000	344000	261000	269000	427000	263000	366000	317000	293000	333000	425000	442000	472000	449000	464000	452000	279000	362000	342000	359000
pme3033	104	1.25	103.056	C4H9NO2	[M+H]+	N,N-Dimethylglycine	Amino acids and derivatives	Amino acids and derivatives	56800	52600	46800	36400	37700	39500	26600	30700	28800	28700	35800	34300	59600	48400	35600	37500	33000	50000	29600	33800	36300	30300
pme3184	332	1.64	331.053	C10H14N5O6P	[M+H]+	2'-Deoxyadenosine-5'-monophosphate	Nucleotides and derivatives	Nucleotides and derivatives	318000	241000	280000	87800	99400	73800	17800	29700	19800	37100	33200	19700	16700	15800	19100	26000	18900	28300	78100	92900	83200	96700
pme3193	116	1.7	117.036	C4H7NO3	[M-H]-	N-Acetylglycine	Amino acids and derivatives	Amino acids and derivatives	4350	4280	3220	2780	3260	1900	765	1640	1750	2230	2730	2380	1200	918	1090	950	577	965	3380	1710	1920	1840
pme3211	463	4.31	464.076	C21H20O12	[M-H]-	Quercetin 3-O-glucoside(Isotrifoliin)	Flavonoids	Flavonols	1410000	1320000	663000	252000	602000	241000	9	9	9	9	9	9	9	61300	37600	9	9	9	317000	334000	308000	346000
pme3337	384	2.67	383.09	C14H17N5O8	[M+H]+	N6-Succinyl Adenosine	Nucleotides and derivatives	Nucleotides and derivatives	337000	310000	364000	344000	458000	356000	740000	276000	568000	628000	726000	594000	1120000	1350000	1450000	740000	599000	749000	467000	633000	661000	662000
pme3388	189	1.18	188.114	C7H16N4O2	[M+H]+	H-HomoArg-OH	Amino acids and derivatives	Amino acids and derivatives	3220	1210	2410	9	9	9	8610	795	1680	1200	982	1530	2000	1890	1650	2340	2290	2730	2830	2290	2140	2270
pme3705	193.14	1.22	194.033	C6H10O7	[M-H]-	D-Glucoronic acid	Others	Saccharides and Alcohols	58300	63800	67200	57300	63800	60400	26200	29500	21600	29200	35200	27600	19200	16400	17200	23500	18800	19600	26600	37400	32300	36600
pme3732	244.09	1.32	243.073	C9H13N3O5	[M+H]+	Cytidine	Nucleotides and derivatives	Nucleotides and derivatives	178000	158000	226000	153000	138000	118000	583000	44600	201000	98900	115000	153000	499000	405000	402000	291000	324000	267000	257000	292000	264000	230000
pme3827	198.2	1.65	197.059	C9H11NO4	[M+H]+	3,4-Dihydroxy-DL-phenylalanine	Amino acids and derivatives	Amino acids and derivatives	15800	23600	6220	9330	7190	8770	12600	2930	15800	14100	6840	4970	8720	14500	5200	13200	14700	6120	14500	17100	12100	11700
pme3967	312	2.73	311.107	C12H17N5O5	[M+H]+	2-(Dimethylamino)guanosine	Nucleotides and derivatives	Nucleotides and derivatives	42600	37800	40900	28500	30500	29200	285000	64800	142000	85700	72500	110000	120000	134000	148000	119000	117000	81700	69800	92600	94700	91700
pme3968	166	1.8	165.057	C6H7N5O	[M+H]+	7-Methylguanine	Nucleotides and derivatives	Nucleotides and derivatives	26100	21900	26900	10200	9890	9250	8940	17400	10100	18600	18300	17600	6860	9440	9540	12900	4690	10500	16500	15800	20100	18500
pmf0359	325.08	3.33	324.07	C15H16O8	[M+H]+	Skimmin	Lignans and Coumarins	Coumarins	2150000	1900000	2840000	2090000	1700000	2160000	611000	121000	259000	1110000	3360000	539000	352000	265000	311000	498000	468000	868000	1110000	1270000	1090000	1200000
pmf0585	116.1	1.29	115.056	C5H9NO2	[M+H]+	DL-Proline	Amino acids and derivatives	Amino acids and derivatives	979000	1320000	871000	236000	455000	270000	2340000	3380000	1560000	2700000	1990000	2570000	8460000	9580000	8850000	2760000	2010000	2630000	2690000	2950000	3000000	2680000
pmn001367	315.07	2.39	316.065	C13H16O9	[M-H]-	Protocatechuic acid-4-glucoside	Phenolic acids	Phenolic acids	337000	375000	357000	201000	188000	235000	146000	183000	160000	205000	510000	175000	1090000	906000	614000	305000	190000	778000	311000	371000	355000	379000
pmn001368	699.25	3.2	700.221	C32H44O17	[M-H]-	Olivin Diglucoside	Lignans and Coumarins	Lignans	12600	14600	16200	6120	5400	6920	9	9	9	9	9	9	1470	432	638	9	641	902	4034	4560	4340	4620
pmn001373	741.24	4.01	742.23	C34H46O18	[M-H]-	Eugenol diglucose	Phenolic acids	Phenolic acids	124000	138000	176000	45000	75300	60100	9	9	9	12800	6520	7820	9	9	9	9	9	9	51800	57300	50300	46600
pmn001374	417.16	5.75	418.142	C22H26O8	[M-H]-	Ding Xiang Su	Phenolic acids	Phenolic acids	15500	16300	16200	11200	15600	12000	3040	14300	8610	9920	9280	9710	17400	38200	25700	16300	7860	21800	19300	18800	17300	15100
pmn001375	535.18	4.26	536.163	C26H32O12	[M-H]-	1-Hydroxyterpinin monoglucoside	Lignans and Coumarins	Lignans	38100	36900	41100	10500	11400	14600	9	9	9	9	9	9	7080	10600	9	9	9	9	16100	16800	18200	13100
pmn001379	579.36	4.68	580.186	C28H36O13	[M-H]-	Eugenol monoglucose	Phenolic acids	Phenolic acids	4970000	5660000	6350000	1760000	2940000	2080000	20900	679000	267000	808000	286000	464000	9	9	9	25600	20900	51200	1850000	2070000	2030000	2150000
pmn001380	187.1	5.03	188.093	C9H16O4	[M-H]-	Eucommiol	Others	Others	30000	24600	13000	15700	18600	10900	57000	15100	31100	42000	39400	50000	10700	9160	6400	6370	11100	6280	25900	26900	26800	19300
pmn001415	451.1	4.45	452.093	C24H20O9	[M-H]-	Catechin-(7,8-bc)-4β-(3,4-dihydroxyphenyl)-dihydro-2-(3H)-pyranone	Flavonoids	Flavanols	22100	17800	18400	9	9	9	9	9	9	9	9	9	9	9	9	9	9	9	10300	9870	7370	6240
pmn001416	451.1	4.72	452.093	C24H20O9	[M-H]-	Catechin-(7,8-bc)-4α-(3,4-dihydroxyphenyl)-dihydro-2-(3H)-pyranone	Flavonoids	Flavanols	27300	18300	20700	9	9	9	9	9	9	9	9	9	9	9	9	9	9	9	9230	9030	5220	5753
pmn001419	325.09	3.5	326.085	C15H18O8	[M-H]-	1-O-[(E)-p-Cumaroyl]-β-D-glucopyranose	Phenolic acids	Phenolic acids	3370000	2960000	3710000	2800000	2080000	3440000	9	9	9	9	9	9	10300000	9430000	8180000	3260000	1560000	2730000	2660000	2970000	2920000	2880000
pmn001420	341.08	3.43	342.079	C15H18O9	[M-H]-	1-O-[(E)-Caffeoyl]-β-D-glucopyranose	Phenolic acids	Phenolic acids	360000	348000	392000	680000	413000	667000	120000	466000	284000	548000	570000	467000	4530000	4100000	4980000	6040000	3220000	5760000	1650000	1850000	1690000	1840000
pmn001421	337.09	3.82	338.085	C16H18O8	[M-H]-	3-O-(E)-p-Coumaroyl quinic acid	Phenolic acids	Phenolic acids	1290000	1030000	866000	89300	112000	156000	9	9	9	9	9	9	34200	28000	56500	35600	66800	14000	221000	294000	265000	261000
pmn001423	385.18	3.88	386.171	C19H30O8	[M-H]-	Roseoside	Others	Others	289000	270000	277000	98000	129000	93800	1610	10300	5750	3620	6510	10200	10700	9590	7230	9	9	9	93700	120000	81700	83400
pmn001459	547.2	3.59	548.146	C23H32O15	[M-H]-	Sibiricose A6	Phenolic acids	Phenolic acids	7740	6010	9100	3710	3450	4500	9	9	9	9	9	9	16500	21100	23600	24700	6870	37600	4108	4719	5950	5610
pmn001468	461.1	3.17	462.114	C19H26O13	[M-H]-	Sibiricose A3	Phenolic acids	Phenolic acids	4620	3870	3650	272	2170	1600	344	9	453	9	9	9	349	874	448	198	229	887	1140	1450	1050	1650
pmn001494	417.2	5.71	418.142	C22H26O8	[M-H]-	(+)-Syringaresinol	Lignans and Coumarins	Lignans	13200	18000	16200	10100	13600	11900	2530	11100	7750	9410	6800	7690	13600	29800	19800	14400	6350	19200	17700	16900	12500	11800
pmn001495	329.2	5.9	330.251	C19H38O4	[M-H]-	Hexadecanoic acid 2,3-dihydroxypropyl ester	Lipids	Glycerol ester	81300	55000	87900	70800	72300	97100	306000	184000	198000	221000	268000	259000	297000	243000	499000	285000	357000	145000	223000	215000	212000	212000
pmn001502	387.14	5.8	388.133	C21H24O7	[M-H]-	Medioresinol	Lignans and Coumarins	Lignans	9	9	9	2460	9	9	9	9	9	9	9	9	5120	13200	2670	9	928	7820	4340	4040	3500	1930
pmn001505	763.4	6.59	764.388	C41H64O13	[M-H]-	Oleanolic acid-3-O-β-D-pyran xylose(1→3)-β-D-pyran glucuronide	Terpenoids	Triterpene Saponin	60500	34500	46500	57100	48300	44300	9	9	9	9	9	9	9	9	9	30700	15500	14900	37900	37000	31900	25800
pmn001511	285.1	3.25	286.09	C13H18O7	[M-H]-	3-Hydroxy-5-Methylphenol-1-Oxy-β-D-Glucose	Phenolic acids	Phenolic acids	16600	25400	12600	14800	18700	16400	5060	5870	5860	9	9	9	63300	56700	62000	21300	17000	21500	23400	28300	21100	31000
pmn001517	329.1	2.75	330.113	C15H22O8	[M-H]-	3,4,5-Trimethoxyphenyl-β-D-Glucopyranoside	Phenolic acids	Phenolic acids	23700000	26200000	26400000	16600000	16900000	20500000	8460000	26100000	18700000	25800000	31000000	26700000	32800000	35700000	33600000	34100000	27700000	35300000	22700000	24500000	25200000	26300000
pmn001578	255.23	10.72	256.219	C16H32O2	[M-H]-	Hexadecanoic acid	Phenolic acids	Phenolic acids	68000000	61500000	60900000	57500000	60800000	65300000	41600000	33400000	32100000	35800000	34600000	39600000	63100000	60700000	68200000	61000000	54100000	51200000	47500000	43900000	56200000	52400000
pmn001583	609.1	4.06	610.126	C27H30O16	[M-H]-	Bioquercetin	Flavonoids	Flavonols	240000	267000	260000	66600	85900	63700	259000	262000	463000	330000	428000	348000	137000	144000	147000	163000	245000	119000	488000	470000	764000	366000
pmn001610	307.3	11.09	308.248	C20H36O2	[M-H]-	Eicosadienoic acid	Lipids	Free fatty acids	124000	77600	111000	123000	90000	77300	131000	48200	76800	90700	163000	171000	485000	433000	526000	624000	559000	126000	278000	250000	240000	185000
pmn001645	533.1	4.78	534.08	C24H22O14	[M-H]-	Isorhamnetin 3-O-β-(2''-O-acetyl-β-D-glucuronide)	Flavonoids	Flavonols	6660	14200	17100	9	1940	1370	9	9	9	9	9	9	9	9	9	9	9	9	4820	4980	2890	2160
pmn001669	237.1	6.08	238.073	C12H14O5	[M-H]-	Methyl sinapate	Phenolic acids	Phenolic acids	11100	10500	7920	5350	7510	7280	9	9	9	9	9	9	9	9	9	9	9	9	2850	2550	1100	2413
pmn001675	477.1	3.86	478.05	C17H22N2O10S2	[M-H]-	4-Methoxyglucobrassicin	Others	Glucosinolates	25300	22800	27000	18100	30700	17000	3410	2040	1180	2230	3250	1760	18200	19900	16500	13300	9290	15000	13500	15000	11900	13800
pmn001686	287.23	6.64	288.208	C16H32O4	[M-H]-	10,16-Dihydroxy-palmitic acid	Lipids	Free fatty acids	9	9	9	9	9	9	9	9	9	9	9	9	6130	9	13600	7070	7900	756	2460	2260	1880	1460
pmn001688	295.23	7.97	296.214	C18H32O3	[M-H]-	9S-Hyroxy-10E,12E-octadecadienoic acid	Lipids	Free fatty acids	154000	94100	142000	122000	117000	108000	770000	126000	303000	265000	352000	324000	1800000	1580000	3090000	1140000	2280000	747000	755000	801000	779000	740000
pmn001689	311.22	6.35	312.208	C18H32O4	[M-H]-	9-Hydroxy-12-oxo-10-octadecenoic acid	Lipids	Free fatty acids	5580	3870	4970	4410	5750	4180	995	1810	517	1110	1130	944	5410	3700	8690	6170	8360	2600	4290	4750	3100	3140
pmn001690	327.1	3.9	328.133	C16H24O7	[M-H]-	3-Hydroxy-4-isopropylbenzylalcohol 3-glucoside	Phenolic acids	Phenolic acids	203000	218000	255000	59500	59000	58100	86500	812000	347000	417000	482000	441000	201000	251000	151000	224000	95800	273000	222000	255000	222000	251000
pmn001691	327.22	6.12	328.202	C18H32O5	[M-H]-	9,12,13-Trihyroxy-10,15-octadecadienoic acid	Lipids	Free fatty acids	20600	12400	17900	17000	16200	16700	8380	2490	4390	4210	5900	5520	26600	20900	51900	30000	30400	10700	17800	15900	13000	13500
pmn001694	329.23	6.41	330.217	C18H34O5	[M-H]-	9,10,13-Trihyroxy-11-octadecadienoic acid	Lipids	Free fatty acids	74700	49700	82700	68800	69100	84400	269000	164000	188000	207000	243000	234000	262000	217000	446000	246000	338000	129000	203000	199000	196000	186000
pmn001695	371.1	3.96	372.088	C16H20O10	[M-H]-	Trihydroxycinnamoylquinic acid	Phenolic acids	Phenolic acids	593000	615000	657000	271000	318000	367000	182000	811000	408000	567000	642000	620000	1260000	1380000	1440000	752000	686000	1030000	527000	677000	624000	619000
pmn001697	445.08	4.61	446.068	C21H18O11	[M-H]-	Apigenin-7-O-β-D-glucuronide	Flavonoids	Flavonoid	8950000	10400000	8450000	6610000	7680000	5470000	9	9	9	9	9	9	9	9	9	9	9	9	5350000	5950000	4770000	4020000
pmn001700	455.35	10.06	456.329	C30H48O3	[M-H]-	24,30-Dihydroxy-12(13)-enolupinol	Terpenoids	Triterpene	49700	12600	31000	28400	25400	14300	21400	11100	9	9740	14500	26900	64100	64200	68900	145000	104000	80000	30200	43900	45100	24100
pmn001702	461.08	4.25	462.062	C21H18O12	[M-H]-	Tetahydroxy-flavone-7-O-β-D-glucuronide	Flavonoids	Flavonoid	27700000	32200000	36400000	16100000	16600000	13800000	18200	9450	10600	53800	18500	22400	11400	70900	183000	42400	157000	76700	12700000	13000000	12200000	12000000
pmn001710	521.13	4.18	522.114	C24H26O13	[M-H]-	Rosmarinyl Glucoside	Phenolic acids	Phenolic acids	16000	25300	20500	5360	14400	14900	9	24600	12800	7020	6400	10700	5630	7590	5410	2570	3700	7560	10400	12200	10500	7540
pmn001714	655.3	3.9	328.133	C16H24O7	[2M-H]-	3-Hydroxy-4-isopropylbenzylalchol 3-glucoside	Phenolic acids	Phenolic acids	113000	98300	121000	11200	8920	11300	26800	1670000	323000	462000	506000	531000	148000	246000	108000	137000	47000	265000	156000	184000	157000	145000
pmn001728	289.08	4.4	290.112	C15H18N2O4	[M-H]-	N-Acetyl-DL-tryptophan	Amino acids and derivatives	Amino acids and derivatives	9	9	9	9	9	9	842000	4760	215000	59500	44500	59200	25500	31400	65300	74500	39800	32700	59000	61600	51300	51200
pmn001736	623.2	4.31	624.175	C29H36O15	[M-H]-	Verbascoside	Phenolic acids	Phenolic acids	20600000	18800000	16000000	22400000	28200000	25700000	27700000	16200000	22000000	21800000	23200000	21700000	19500000	20400000	25500000	24800000	22900000	17700000	19200000	20300000	22100000	22300000
pmp000001	301.07	6.24	300.053	C16H12O6	[M+H]+	Hispidulin	Flavonoids	Flavonoid	9	9	9	9	9	9	9	9	9	1860	9	9	3350	3670	1960	4730	2520	2460	3500	4630	2950	2390
pmp000012	463.08	4.29	462.062	C21H18O12	[M+H]+	Scutellarin	Flavonoids	Flavonoid	59900000	69200000	68600000	42100000	45400000	40300000	74800	38300	34900	583000	109000	78900	41400	191000	538000	424000	602000	213000	29600000	31200000	26300000	26800000
pmp000087	269.1	3.88	268.081	C13H16O6	[M+H]+	2-Feruloyl-sn-glycerol	Phenolic acids	Phenolic acids	28000	21800	29700	11400	12600	14500	9	9	9	9	9	9	11900	9840	3430	9	9	9	12300	10100	11000	11900
pmp000116	433.1	4.36	432.088	C21H20O10	[M+H]+	Apigenin-8-C-glucoside	Flavonoids	Flavonoid carbonoside	272000	289000	289000	163000	169000	185000	27600	12000	26300	17700	13100	22800	158000	176000	236000	103000	69600	67100	99400	143000	109000	105000
pmp000126	611.2	3.52	610.126	C27H30O16	[M+H]+	Luteolin-6,8-di-C-glucoside	Flavonoids	Flavonoid	79400	67500	71200	22700	28100	26700	9	9	9	9	9	9	44600	57200	74500	45900	29100	32900	27500	34500	35300	37200
pmp000231	339.1	3.83	338.085	C16H18O8	[M+H]+	Trans-3-O-p-coumaric quinic acid	Phenolic acids	Phenolic acids	4150000	3720000	2430000	352000	443000	789000	9	9	9	9	9	9	303000	243000	539000	145000	315000	60800	883000	1090000	1130000	1110000
pmp000232	339.1	3.36	338.085	C16H18O8	[M+H]+	Cis-3-p-coumaric quinic acid	Phenolic acids	Phenolic acids	6350000	5420000	3720000	676000	773000	1640000	9	9	9	9	9	9	486000	364000	1000000	302000	723000	96700	1170000	1600000	1670000	1720000
pmp000236	565.1	4.12	564.123	C26H28O14	[M+H]+	Apigenin-6-C-glucose-8-xylcose	Flavonoids	Flavonoid carbonoside	52200	45400	42600	16600	12800	16100	9	9	9	9	9	9	16400	21200	25500	10400	12600	5610	11600	17400	18700	14800
pmp000239	595.13	4.12	594.097	C26H26O16	[M+H]+	Luteolin-6-C-5-glucuronylxyloside	Flavonoids	Flavonoid	9	9	9	9	9	9	9	9	9	9	9	9	3910	4960	4750	3690	2350	3070	1850	2170	1890	1910
pmp000308	453.18	4.62	452.145	C22H28O10	[M+H]+	4'-O-β-D-Glucosyl-5-O-methylvisamminol	Others	Others	27100	26700	31900	24900	31300	17600	5350	6680	3320	6190	6990	7590	5990	9280	5160	12000	6410	12100	11100	11200	13000	9850
pmp000379	407.19	8.36	406.159	C25H26O5	[M+H]+	6,8-Diprenylgenistein	Tannins	Proanthocyanidins	138000	46500	110000	9	9	9	9	9	9	9	9	9	9	9	9	9	9	9	13100	15800	17100	16500
pmp000411	565.15	4.07	564.123	C26H28O14	[M+H]+	Genistein 8-C-apiosyl(1→6)glucoside	Flavonoids	Flavonoid carbonoside	534000	435000	479000	249000	237000	230000	9	9	9	9	9	9	108000	140000	197000	95600	93400	75700	129000	172000	203000	196000
pmp000413	433.11	4.23	432.088	C21H20O10	[M+H]+	Genistein 8-C-glucoside	Flavonoids	Flavonoid carbonoside	299000	285000	304000	162000	170000	171000	9	9	9	2900	9	9	127000	139000	223000	79800	76500	50000	90300	107000	110000	102000
pmp000479	252.2	8.79	251.206	C16H29NO	[M+H]+	N-isobutyl-2E,4E-dodedienamide	Alkaloids	Alkaloids	6090	3990	1390	6340	8940	7810	3020	3590	5050	3140	1530	4510	4320	8670	7440	3040	5830	7150	3760	4330	4400	3010
pmp000545	355.1	2.87	354.079	C16H18O9	[M+H]+	4-Caffeoylquinic acid	Phenolic acids	Phenolic acids	37000	37200	35400	25500	28800	23100	147000	5510	113000	58500	18700	63200	28100	22900	45800	14900	37200	9460	37300	50000	51200	49700
pmp000548	301.07	6.37	300.053	C16H12O6	[M+H]+	Pratensein	Flavonoids	Isoflavones	3720	3410	5750	1640	2830	919	9	9	9	9	9	9	3160	3190	2190	4870	2610	2280	3400	4050	2590	2490
pmp000576	449.11	4.42	449.089	C21H21O11+	[M]+	Anthocyanin 3-O-beta-D-glucoside	Flavonoids	Anthocyanins	5640000	7260000	6840000	1800000	1850000	1550000	5400	9960	6920	26400	9620	15300	168000	353000	249000	204000	100000	540000	1600000	2010000	1690000	1810000
pmp000578	463.08	4.29	462.079	C25H18O9	[M+H]+	Luteolin-7-O-glucuronide	Flavonoids	Flavonoid	64500000	67900000	74400000	44400000	46000000	39400000	76000	36400	33400	545000	107000	81800	43100	175000	581000	471000	639000	189000	29800000	29900000	27200000	28000000
pmp000579	463.12	4.87	462.096	C22H22O11	[M+H]+	Diosmetin-7-O-galactoside	Flavonoids	Flavonoid	4210000	6140000	6070000	1160000	1340000	1480000	6950	42200	20900	169000	55900	78400	3130000	4330000	4470000	1980000	1170000	2330000	1910000	2570000	2000000	2060000
pmp000580	465.1	4.31	464.076	C21H20O12	[M+H]+	Isoquercitrin(Quercetin 3-O-β-D-glucoside)	Flavonoids	Flavonols	7620000	6790000	3960000	1230000	2700000	965000	9	9	9	9	9	9	105000	217000	171000	118000	27400	47100	1280000	1640000	1600000	1690000
pmp000583	477.1	4.78	476.076	C22H20O12	[M+H]+	Diosmetin-7-O-glucuronide	Flavonoids	Flavonoid	9450000	11000000	12300000	6370000	7200000	7460000	4590	1360	2010	20800	12700	8160	19800	145000	526000	22000	172000	74000	3240000	4080000	3420000	3600000
pmp000594	609.18	4.69	608.146	C28H32O15	[M+H]+	Diosmetin-7-O-rutin	Flavonoids	Flavonoid	2020000	2290000	2620000	356000	423000	404000	18800	9	5990	8260	18400	10100	4000000	4360000	4840000	3710000	1720000	2420000	1350000	1770000	1420000	1320000
pmp000596	627.15	3.37	626.12	C27H30O17	[M+H]+	Quercetin 3,7-bis-O-β-D-glucoside	Flavonoids	Flavonols	16500	11600	18600	3020	3590	5600	1640	3080	647	2730	2590	2830	40600	38400	72000	49100	27200	35100	9700	15100	18200	18200
pmp000967	205.1	3.01	204.08	C11H12N2O2	[M+H]+	Tryptophan	Amino acids and derivatives	Amino acids and derivatives	1380000	1140000	533000	1110000	1500000	992000	64800000	1740000	27000000	9050000	9190000	7210000	20100000	23500000	35600000	10600000	4590000	5760000	13300000	15000000	15200000	15400000
pmp000991	823.3	5.41	822.253	C39H50O19	[M+H]+	Hexandraside D	Flavonoids	Flavonols	9	9	9	6540	1610	6530	9300	12100	11400	14600	15300	17400	23700	31900	25200	49800	10300	46600	12800	13100	9850	10700
pmp001080	609.18	4.62	608.146	C28H32O15	[M+H]+	Neodiosmin	Flavonoids	Flavonoid	2070000	2340000	2670000	428000	430000	410000	21700	2800	6360	6960	17300	9580	4000000	4450000	4720000	3840000	1640000	2500000	1380000	1710000	1400000	1380000
pmp001086	127	1.29	126.026	C6H6O3	[M+H]+	5-Hydroxymethylfurfural	Phenolic acids	Phenolic acids	5400	5120	3660	6060	4380	1930	39200	13300	42000	15500	19300	23300	16400	22000	19900	6950	12600	13500	14100	17100	18500	17700
pmp001106	595.17	3.61	594.132	C27H30O15	[M+H]+	Vitexin-2-O-D-glucopyranoside	Flavonoids	Flavonoid carbonoside	617000	560000	625000	371000	382000	399000	9	9	9	9	9	9	149000	170000	240000	143000	114000	82800	173000	267000	256000	245000
pmp001110	535.14	4.17	534.114	C25H26O13	[M+H]+	Apigenin-6-C-β-D-xyloside-8-C-β-Darabinoside	Flavonoids	Flavonoid carbonoside	360000	348000	349000	155000	117000	110000	9	9	9	9	9	9	49000	68600	108000	53100	35100	33000	89900	108000	92400	100000
pmp001164	493.1	4.65	492.105	C23H24O12	[M+H]+	Iristectorin B	Flavonoids	Isoflavones	22400	23500	25300	4240	4710	4070	9	9	9	9	9	9	64100	70200	70600	33400	12700	31700	31600	37300	34000	28500
pmp001166	317.1	5.58	316.047	C16H12O7	[M+H]+	Irilin D	Flavonoids	Isoflavones	71100	102000	113000	15000	21800	9370	9	9	9	9	9	9	9	1100	1000	9	9	9	6060	9280	8650	8200
pmp001201	162.1	1.24	161.094	C7H15NO3	[M+H]+	5-Aminocycloheptane-1,2,3-triol	Alkaloids	Alkaloids	5350	1350	6350	6540	2270	6080	2590	5100	2020	628	4800	1020	6270	5800	3310	991	518	1480	1040	2950	2310	4060
pmp001213	166.08	2.41	165.07	C9H11NO2	[M+H]+	Phenylalanine	Amino acids and derivatives	Amino acids and derivatives	3540000	2320000	1990000	2620000	4050000	2540000	15800000	1770000	5510000	3790000	3880000	3880000	8560000	8080000	10900000	7230000	8950000	5730000	5430000	6220000	6290000	6290000
pmp001250	520.34	7.42	520.304	C26H51NO7P+	[M]+	PC(18:2)	Lipids	PC	302000	152000	289000	634000	559000	715000	1720000	367000	737000	950000	1600000	1490000	195000	250000	370000	1270000	1200000	673000	580000	670000	680000	719000
pmp001251	520.34	7.24	520.304	C26H51NO7P+	[M]+	PC(18:2)isomer	Lipids	PC	282000	138000	284000	586000	525000	688000	1670000	370000	702000	973000	1610000	1480000	194000	242000	355000	1260000	1170000	684000	584000	675000	643000	666000
pmp001264	274.28	6.5	273.243	C16H35NO2	[M+H]+	Hexadecylsphingosine	Lipids	Sphingolipids	9710000	9240000	7110000	7620000	7550000	8530000	5650000	6700000	6220000	6940000	6270000	6900000	9650000	8700000	11100000	11300000	8730000	9960000	6780000	8250000	6550000	7080000
pmp001270	494.33	7.08	493.282	C24H48NO7P	[M+H]+	LysoPC(16:2)	Lipids	LPC	1190000	548000	1170000	2880000	2570000	3320000	3210000	414000	1240000	1850000	3750000	2590000	661000	664000	1140000	4800000	3500000	1890000	1550000	1800000	1630000	1740000
pmp001271	679.39	7.32	678.339	C33H58O14	[M+H]+	2,3-Dihydroxypropyl-9,12-octadecadienoate-hexose-hexose	Lipids	Free fatty acids	1020000	962000	1130000	1260000	993000	790000	200000	212000	133000	238000	405000	475000	98000	120000	119000	506000	302000	375000	392000	493000	554000	753000
pmp001272	478.29	7.4	477.253	C23H44NO7P	[M+H]+	3-{(2-Aminoethoxy)(hydroxy)phosphoryl]oxy}-2-12-octadecadienoate	Alkaloids	Alkaloids	11900000	5550000	9550000	23600000	23800000	29300000	56000000	18100000	31900000	34300000	58600000	55000000	12700000	18200000	25300000	53000000	50800000	31800000	24700000	28500000	33700000	37800000
pmp001273	520.34	7.43	519.296	C26H50NO7P	[M+H]+	LysoPC(18:2)	Lipids	LPC	302000	142000	300000	642000	543000	752000	1700000	321000	719000	992000	1600000	1480000	195000	243000	369000	1280000	1200000	689000	578000	677000	680000	702000
pmp001274	542.32	7.43	541.282	C28H48NO7P	[M+H]+	2-Hydroxy-5,8,11,14,17-icosapentaenoyloxy ]propyl-2-(trimethylammonio)ethyl phosphate	Alkaloids	Alkaloids	316000	177000	314000	899000	907000	985000	2380000	654000	1290000	1400000	2140000	2120000	340000	415000	564000	1800000	1620000	979000	716000	993000	991000	962000
pmp001275	672.42	7.7	671.363	C31H61O14N	[M+H]+	3-Hydroxypropyl palmitate glc-glucosamine	Alkaloids	Alkaloids	1460000	754000	1170000	1240000	1040000	983000	190000	135000	86200	180000	134000	185000	68600	65800	87200	202000	135000	152000	338000	471000	376000	363000
pmp001276	677.37	7.7	676.324	C33H56O14	[M+H]+	2,3-Dihydroxypropyl-9,12,15-octadecatrienoate-hexose-hexose	Lipids	Free fatty acids	644000	484000	578000	672000	616000	474000	115000	91700	66100	97500	73600	112000	50000	45700	61200	132000	89000	95600	149000	327000	240000	142000
pmp001277	454.3	7.76	453.253	C21H44NO7P	[M+H]+	3-{(2-Aminoethoxy)(hydroxy)phosphoryl]oxy}-2-hydroxypropyl palmitate	Alkaloids	Alkaloids	242000	319000	376000	271000	385000	376000	2010000	759000	1550000	1290000	1110000	1380000	645000	678000	490000	447000	291000	688000	511000	631000	610000	613000
pmp001278	496.34	7.81	495.296	C24H50NO7P	[M+H]+	LysoPC(16:1)	Lipids	LPC	3000000	3680000	5090000	2840000	3940000	2960000	12500000	3760000	8410000	6260000	4250000	5600000	5230000	6900000	5350000	4190000	2710000	6130000	3940000	4770000	4110000	3790000
pmp001279	518.32	7.81	517.276	C21H48N3O9P	[M+H]+	Bis(N,N-diethylethanaminium)-2-acetamido-1,5-anhydro-2-deoxy-1-[-hydroxy(phosphonato)methyl]-D-glucitol	Alkaloids	Alkaloids	113000	145000	189000	128000	167000	146000	381000	117000	277000	161000	114000	158000	184000	244000	207000	140000	97100	201000	86500	165000	161000	192000
pmp001280	480.31	8.07	479.268	C23H46NO7P	[M+H]+	3-{[(2-Aminoethoxy)(hydroxy)phosphoryl]oxy}-2-hydroxypropyl-9,12-octadecenoate	Alkaloids	Alkaloids	3630000	1380000	2950000	4180000	4460000	5060000	6710000	7640000	9650000	8960000	23900000	20700000	3680000	3860000	5680000	20000000	13600000	8670000	6520000	8160000	7610000	7260000
pmp001281	522.36	8.12	521.311	C26H52NO7P	[M+H]+	LysoPC(18:1)	Lipids	LPC	15700000	7330000	16400000	17000000	17700000	24800000	18600000	9930000	18300000	16300000	41900000	35600000	10000000	11000000	17100000	49300000	35800000	23200000	13600000	15900000	19400000	20900000
pmp001282	544.34	8.12	543.296	C28H50NO7P	[M+H]+	Propyl2-(trimethylammonio)ethyl phosphate	Others	Others	319000	170000	306000	287000	307000	324000	165000	158000	141000	165000	319000	290000	129000	167000	9	520000	401000	315000	117000	232000	261000	366000
pmp001283	355.29	8.23	354.251	C21H38O4	[M+H]+	Glyceryl linoleate	Lipids	Glycerol ester	449000	309000	559000	815000	467000	547000	33300	31600	33000	35500	55400	54800	71000	73900	70900	367000	211000	222000	227000	320000	273000	269000
pmp001284	331.28	8.68	330.251	C19H38O4	[M+H]+	Glycerin Monopalmitate	Lipids	Glycerol ester	55800	23200	55700	63400	50400	61600	9	9	9	9	9	9	9	9	9	15000	10200	9340	15100	22500	19600	22000
pmp001285	149.02	8.71	148.012	C8H4O3	[M+H]+	Phthalic anhydride	Phenolic acids	Phenolic acids	1730000	2770000	1670000	2410000	2420000	2340000	3430000	5850000	4540000	8770000	4820000	5530000	1540000	1920000	2160000	2800000	1510000	2220000	2300000	2640000	2830000	3110000
pmp001286	524.37	8.95	523.325	C26H54NO7P	[M+H]+	LysoPC(18:0)	Lipids	LPC	156000	235000	310000	111000	174000	166000	698000	475000	533000	498000	411000	470000	263000	373000	298000	233000	171000	373000	227000	296000	266000	219000
pmp001287	120.08	2.42	119.067	C8H9N	[M+H]+	N-Benzylmethylene isomethylamine	Alkaloids	Alkaloids	510000	336000	296000	353000	553000	352000	2010000	212000	702000	480000	488000	503000	1160000	1050000	1480000	1030000	1220000	776000	654000	763000	787000	764000
pmp001289	653.1	4.07	652.1	C28H28O18	[M+H]+	Chrysoeriol-7-O-[β-D-glucuronopyranosyl-(1→2)-O-β-D-glucuronopyranoside]	Flavonoids	Flavonoid	78400	65300	58100	66100	73700	57000	9	9	9	9	9	9	9	9	9	9	9	9	16300	32300	37000	35900
pmp001290	623.1	3.98	622.091	C27H26O17	[M+H]+	Apigenin-7-O-[β-D-glucuronopyranosyl(1→2)-O-β-D-glucuronopyranoside)	Flavonoids	Flavonoid	11300000	10600000	10800000	15800000	17700000	17400000	4430	3970	6020	3220	3540	2720	9	9	9	9090	6320	9490	4260000	6650000	6460000	6900000
pmp001309	465.1	4.15	464.076	C21H20O12	[M+H]+	6-Hydroxykaempferol-7-O-glucoside	Flavonoids	Flavonols	9790000	8540000	4430000	1510000	3270000	1310000	9	9	9	9	9	9	123000	283000	195000	145000	43200	59900	1520000	1740000	1830000	1960000
pmp001310	627.2	3.82	626.12	C27H30O17	[M+H]+	6-Hydroxykaempferol-3,6-O-Diglucoside	Flavonoids	Flavonols	9	9	9	9	9	9	9	9	9	6360	9	5900	21500	26600	27200	18500	10800	14000	7120	7470	8690	7230
pmp001311	627.2	3.38	626.12	C27H30O17	[M+H]+	6-Hydroxykaempferol-7,6-O-Diglucoside	Flavonoids	Flavonols	16800	12500	15100	6940	6490	5540	9	9	1960	9	9	9	39800	40700	63500	50900	23300	32300	11600	20800	21400	24200
			Young roots, young stems, and young leaves are represented by the mRY, mSY, and mLY, respectively, and mature roots, mature stems, and mature leaves are represented by the mOR, mOS, and mOL, respectively. Mix1-Mix4 represent the mixed samples for quality control during the metabolite assay.

## Sheet: Table S4
				Table S4. Differential metabolites in the roots vs leaves of mature A. ilicifolius
Index	Formula	Compounds	Class I	Class II	CAS	Level	mRO1	mRO2	mRO3	mLO1	mLO2	mLO3	VIP	Fold_Change	Log2FC	Type
GQ512006	C27H30O16	Quercetin-3-O-glucoside-7-O-rhamnoside	Flavonoids	Flavonols	-	A	9	9	9	1040000	995000	713000	1.23544	101778	16.6351	up
mws0045	C21H20O11	Quercitrin	Flavonoids	Flavonols	522-12-3	B	5330	2990	4360	445	745	294	1.18961	0.117035	-3.09499	down
mws0047	C27H30O14	Rhoifolin	Flavonoids	Flavonoid	17306-46-6	A	9	9	9	8340000	10100000	10800000	1.23579	1.08296e+06	20.0466	up
mws0052	C21H18O11	Baicalin	Flavonoids	Flavonoid	21967-41-9	A	9250	4180	6710	25400000	30000000	28500000	1.2338	4165.84	12.0244	up
mws0057	C21H22O11	Eriodictyol 7-O-glucoside	Flavonoids	Dihydroflavone	38965-51-4	B	9	9	9	82300	72200	74000	1.23584	8462.96	13.0469	up
mws0061	C21H20O12	Hyperin	Flavonoids	Flavonols	482-36-0	B	9	9	9	612000	619000	292000	1.23419	56407.4	15.7836	up
mws0066	C16H12O7	Isorhamnetin	Flavonoids	Flavonols	480-19-3	A	80700	58700	58600	16100	20500	17400	1.21198	0.272727	-1.87447	down
mws0072	C21H20O10	Apigenin 5-O-glucoside	Flavonoids	Flavonoid	28757-27-9	B	9	9	9	13800	9710	13500	1.23555	1370.74	10.4207	up
mws0089	C21H20O11	Kaempferol 7-O-glucosdie	Flavonoids	Flavonols	16290-07-6	B	9	5290	3370	196000	254000	224000	1.01668	77.7483	6.28074	up
mws0856	C21H20O12	Spiraeoside	Flavonoids	Flavonols	20229-56-5	A	9	9	9	1230000	1340000	647000	1.23454	119148	16.8624	up
mws0911	C15H10O5	Demethyltexasin	Flavonoids	Isoflavones	17817-31-1	B	9	9	9	5980	1920	4500	1.22897	459.259	8.84316	up
mws0913	C21H20O11	Trifolin	Flavonoids	Flavonols	23627-87-4	B	1400	1720	3560	1050000	1380000	1770000	1.22888	628.743	9.29633	up
mws1066	C27H32O14	Narirutin	Flavonoids	Dihydroflavone	14259-46-2	B	9	9	9	48500	70000	76800	1.23525	7233.33	12.8204	up
mws1073	C27H30O15	Apigenin 6,8-C-diglucoside	Flavonoids	Flavonoid	23666-13-9	A	4180	7510	2990	3420000	3130000	3440000	1.23264	680.518	9.41049	up
mws1140	C15H12O5	Naringenin chalcone(4,2',4',6'-Tetrahydroxychalcone)	Flavonoids	Chalcones	73692-50-9	B	525	641	1290	9	9	9	1.22827	0.0109935	-6.50721	down
mws1292	C26H28O14	Isoschaftoside	Flavonoids	Flavonoid carbonoside	52012-29-0	B	3340	6570	1150	3100000	2450000	2550000	1.22404	732.369	9.51643	up
mws1329	C21H20O12	Gossypitrin	Flavonoids	Flavonols	491-50-9	A	5790	4330	6590	12900	14700	11900	1.17364	2.36385	1.24114	up
mws1660	C26H28O14	Schaftoside	Flavonoids	Flavonoid carbonoside	51938-32-0	A	9	9	9	19100	14000	15500	1.23561	1800	10.8138	up
mws1661	C28H32O15	Diosmin	Flavonoids	Flavonoid	520-27-4	A	14600	4030	4430	3820000	4300000	5320000	1.22654	582.827	9.18692	up
mws2209	C21H20O11	Astragalin	Flavonoids	Flavonols	480-10-4	B	1680	9350	3390	201000	245000	227000	1.20024	46.6713	5.54446	up
mws2471	C15H11O7	Delphinidin chloride	Flavonoids	Anthocyanins	528-53-0	B	4990	6270	3890	15600	18400	10200	1.13873	2.91749	1.54473	up
pmb0550	C21H21O11	Cyanidin 3-O-glucoside(Kuromanin)	Flavonoids	Anthocyanins	7084-24-4	B	19800	18500	22900	9	9	9	1.2359	0.000441176	-11.1464	down
pmb0652	C26H28O14	C-Hexosyl-apigenin O-pentoside	Flavonoids	Flavonoid carbonoside	-	B	9	9	9	41000	30100	53500	1.23531	4614.81	12.1721	up
pmb0665	C27H30O16	Luteolin 8-C-hexosyl-O-hexoside	Flavonoids	Flavonoid	-	B	44600	38900	41600	20100	18800	18700	1.22717	0.460432	-1.11894	down
pmb0736	C23H24O12	Tricin 7-O-hexoside	Flavonoids	Flavonoid	-	B	9	9	9	432000	531000	645000	1.23566	59555.6	15.8619	up
pmb2992	C22H20O11	Acacetin-O-glucuronic acid	Flavonoids	Flavonoid	-	B	9	9	9	28400	22600	31800	1.23574	3066.67	11.5825	up
pmb3007	C22H20O12	Chrysoeriol O-glucuronic acid	Flavonoids	Flavonoid	-	B	9	9	9	1900000	1890000	2040000	1.23588	215926	17.7202	up
pmb3012	C22H22O11	Chrysoeriol 7-O-hexoside	Flavonoids	Flavonoid	-	B	9	9	9	146000	203000	184000	1.23553	19740.7	14.2689	up
pmb3024	C21H20O11	Luteolin C-hexoside	Flavonoids	Flavonoid	-	B	2710	15400	11200	9	9	9	1.22153	0.000921187	-10.0842	down
pmb3041	C23H22O14	Tricin O-saccharic acid	Flavonoids	Flavonoid	-	B	24000	209000	88400	905000	959000	859000	1.10019	8.47231	3.08276	up
pmb3043	C29H34O16	Tricin 5-O-rutinoside	Flavonoids	Flavonoid	-	B	9	9	9	14800	8810	13000	1.23507	1355.93	10.4051	up
pmb3894	C17H14O7	Di-O-methylquercetin	Flavonoids	Flavonols	2068-02-2	A	300000	182000	195000	82500	56300	85800	1.15267	0.331758	-1.5918	down
pme0001	C28H34O15	Hesperetin 7-O-neohesperidoside(Neohesperidin)	Flavonoids	Dihydroflavone	13241-33-3	B	9	9	9	13200	13200	19200	1.23544	1688.89	10.7219	up
pme0369	C27H30O15	Kaempferol 3-O-rutinoside(Nicotiflorin)	Flavonoids	Flavonols	17650-84-9	B	9	9	9	1520000	1850000	1850000	1.23577	193333	17.5607	up
pme1598	C22H24O11	Hesperetin 5-O-glucoside	Flavonoids	Dihydroflavonol	69651-80-5	B	9	9	9	1150000	1350000	591000	1.23427	114481	16.8048	up
pme1605	C27H30O15	Kaempferol 3-O-robinobioside(Biorobin)	Flavonoids	Flavonols	17297-56-2	A	9	9	9	1560000	1810000	1990000	1.2358	198519	17.5989	up
pme1665	C27H30O15	Isovitexin 7-O-glucoside(Saponarin)	Flavonoids	Flavonoid carbonoside	20310-89-8	B	9	9	9	13900	16000	16800	1.23573	1729.63	10.7562	up
pme3211	C21H20O12	Quercetin 3-O-glucoside(Isotrifoliin)	Flavonoids	Flavonols	21637-25-2	A	9	9	9	1410000	1320000	663000	1.23449	125667	16.9392	up
pmn001415	C24H20O9	Catechin-(7,8-bc)-4β-(3,4-dihydroxyphenyl)-dihydro-2-(3H)-pyranone	Flavonoids	Flavanols	-	B	9	9	9	22100	17800	18400	1.23572	2159.26	11.0763	up
pmn001416	C24H20O9	Catechin-(7,8-bc)-4α-(3,4-dihydroxyphenyl)-dihydro-2-(3H)-pyranone	Flavonoids	Flavanols	-	B	9	9	9	27300	18300	20700	1.23543	2455.56	11.2618	up
pmn001645	C24H22O14	Isorhamnetin 3-O-β-(2''-O-acetyl-β-D-glucuronide)	Flavonoids	Flavonols	-	B	9	9	9	6660	14200	17100	1.23191	1405.93	10.4573	up
pmn001697	C21H18O11	Apigenin-7-O-β-D-glucuronide	Flavonoids	Flavonoid	-	B	9	9	9	8950000	10400000	8450000	1.23571	1.02963e+06	19.9737	up
pmn001702	C21H18O12	Tetahydroxy-flavone-7-O-β-D-glucuronide	Flavonoids	Flavonoid	-	A	18200	9450	10600	27700000	32200000	36400000	1.23433	2517.65	11.2979	up
pmp000012	C21H18O12	Scutellarin	Flavonoids	Flavonoid	27740-01-8	A	74800	38300	34900	59900000	69200000	68600000	1.2336	1335.81	10.3835	up
pmp000116	C21H20O10	Apigenin-8-C-glucoside	Flavonoids	Flavonoid carbonoside	3681-93-4	A	27600	12000	26300	272000	289000	289000	1.20915	12.8983	3.68911	up
pmp000126	C27H30O16	Luteolin-6,8-di-C-glucoside	Flavonoids	Flavonoid	29428-58-8	B	9	9	9	79400	67500	71200	1.23584	8077.78	12.9797	up
pmp000236	C26H28O14	Apigenin-6-C-glucose-8-xylcose	Flavonoids	Flavonoid carbonoside	-	B	9	9	9	52200	45400	42600	1.23571	5192.59	12.3422	up
pmp000411	C26H28O14	Genistein 8-C-apiosyl(1→6)glucoside	Flavonoids	Flavonoid carbonoside	-	B	9	9	9	534000	435000	479000	1.23585	53629.6	15.7107	up
pmp000413	C21H20O10	Genistein 8-C-glucoside	Flavonoids	Flavonoid carbonoside	66026-80-0	A	9	9	9	299000	285000	304000	1.23589	32888.9	15.0053	up
pmp000548	C16H12O6	Pratensein	Flavonoids	Isoflavones	2284-31-3	B	9	9	9	3720	3410	5750	1.23463	477.037	8.89796	up
pmp000576	C21H21O11+	Anthocyanin 3-O-beta-D-glucoside	Flavonoids	Anthocyanins	-	A	5400	9960	6920	5640000	7260000	6840000	1.23383	885.996	9.79116	up
pmp000578	C25H18O9	Luteolin-7-O-glucuronide	Flavonoids	Flavonoid	29741-10-4	A	76000	36400	33400	64500000	67900000	74400000	1.23332	1418.38	10.47	up
pmp000579	C22H22O11	Diosmetin-7-O-galactoside	Flavonoids	Flavonoid	-	B	6950	42200	20900	4210000	6140000	6070000	1.21369	234.404	7.87285	up
pmp000580	C21H20O12	Isoquercitrin(Quercetin 3-O-β-D-glucoside)	Flavonoids	Flavonols	482-35-9	A	9	9	9	7620000	6790000	3960000	1.23508	680370	19.376	up
pmp000583	C22H20O12	Diosmetin-7-O-glucuronide	Flavonoids	Flavonoid	35110-20-4	A	4590	1360	2010	9450000	11000000	12300000	1.23157	4114.32	12.0064	up
pmp000594	C28H32O15	Diosmetin-7-O-rutin	Flavonoids	Flavonoid	-	A	18800	9	5990	2020000	2290000	2620000	1.05005	279.447	8.12643	up
pmp000596	C27H30O17	Quercetin 3,7-bis-O-β-D-glucoside	Flavonoids	Flavonols	-	B	1640	3080	647	16500	11600	18600	1.15017	8.70132	3.12123	up
pmp000991	C39H50O19	Hexandraside D	Flavonoids	Flavonols	137218-02-1	B	9300	12100	11400	9	9	9	1.23565	0.000823171	-10.2465	down
pmp001080	C28H32O15	Neodiosmin	Flavonoids	Flavonoid	38665-01-9	A	21700	2800	6360	2070000	2340000	2670000	1.2106	229.423	7.84187	up
pmp001106	C27H30O15	Vitexin-2-O-D-glucopyranoside	Flavonoids	Flavonoid carbonoside	-	A	9	9	9	617000	560000	625000	1.2359	66740.7	16.0263	up
pmp001110	C25H26O13	Apigenin-6-C-β-D-xyloside-8-C-β-Darabinoside	Flavonoids	Flavonoid carbonoside	-	A	9	9	9	360000	348000	349000	1.23586	39148.1	15.2567	up
pmp001164	C23H24O12	Iristectorin B	Flavonoids	Isoflavones	94396-09-5	B	9	9	9	22400	23500	25300	1.23585	2637.04	11.3647	up
pmp001166	C16H12O7	Irilin D	Flavonoids	Isoflavones	204590-67-0	A	9	9	9	71100	102000	113000	1.23531	10596.3	13.3713	up
pmp001289	C28H28O18	Chrysoeriol-7-O-[β-D-glucuronopyranosyl-(1→2)-O-β-D-glucuronopyranoside]	Flavonoids	Flavonoid	-	B	9	9	9	78400	65300	58100	1.23557	7474.07	12.8677	up
pmp001290	C27H26O17	Apigenin-7-O-[β-D-glucuronopyranosyl(1→2)-O-β-D-glucuronopyranoside)	Flavonoids	Flavonoid	-	A	4430	3970	6020	11300000	10600000	10800000	1.2348	2267.68	11.147	up
pmp001309	C21H20O12	6-Hydroxykaempferol-7-O-glucoside	Flavonoids	Flavonols	-	A	9	9	9	9790000	8540000	4430000	1.2348	842963	19.6851	up
pmp001311	C27H30O17	6-Hydroxykaempferol-7,6-O-Diglucoside	Flavonoids	Flavonols	-	B	9	9	1960	16800	12500	15100	1.03316	22.4469	4.48845	up
pmp001314	C33H40O21	6-Hydroxykaempferol-3-O-rutin-6-O-glucoside	Flavonoids	Flavonols	-	B	1850	1750	2720	9500	9160	9380	1.21305	4.43671	2.14949	up

## Sheet: Table S5
					Table S5. Differential metabolites in the roots vs stems of mature A. ilicifolius
Index	Formula	Compounds	Class I	Class II	CAS	Level	mRO1	mRO2	mRO3	mSO1	mSO2	mSO3	VIP	Fold_Change	Log2FC	Type
GQ512006	C27H30O16	Quercetin-3-O-glucoside-7-O-rhamnoside	Flavonoids	Flavonols	-	A	9	9	9	57100	77400	57400	1.31853	7107.41	12.7951	up
Li512117	C27H30O16	Quercetin 3-O-rhanosylgalactoside	Flavonoids	Flavonols	-	A	44100	28900	40500	14700	21200	20500	1.1855	0.496916	-1.00893	down
mws0045	C21H20O11	Quercitrin	Flavonoids	Flavonols	522-12-3	B	5330	2990	4360	1330	1880	2130	1.17586	0.421136	-1.24764	down
mws0047	C27H30O14	Rhoifolin	Flavonoids	Flavonoid	17306-46-6	A	9	9	9	227000	222000	270000	1.31918	26629.6	14.7007	up
mws0057	C21H22O11	Eriodictyol 7-O-glucoside	Flavonoids	Dihydroflavone	38965-51-4	B	9	9	9	4500	11200	10500	1.31392	970.37	9.92239	up
mws0058	C16H12O6	Diosmetin	Flavonoids	Flavonoid	520-34-3	B	9	9	9	5220	5550	4640	1.31877	570.741	9.15669	up
mws0059	C27H30O16	Rutin	Flavonoids	Flavonols	153-18-4	B	191000	217000	372000	110000	98500	101000	1.20604	0.396795	-1.33353	down
mws0061	C21H20O12	Hyperin	Flavonoids	Flavonols	482-36-0	B	9	9	9	6940	21700	16300	1.31284	1664.44	10.7008	up
mws0072	C21H20O10	Apigenin 5-O-glucoside	Flavonoids	Flavonoid	28757-27-9	B	9	9	9	5340	5700	14000	1.31436	927.407	9.85706	up
mws0089	C21H20O11	Kaempferol 7-O-glucosdie	Flavonoids	Flavonols	16290-07-6	B	9	5290	3370	55700	77500	127000	1.01144	30.015	4.90761	up
mws0856	C21H20O12	Spiraeoside	Flavonoids	Flavonols	20229-56-5	A	9	9	9	26800	50400	35700	1.31746	4181.48	12.0298	up
mws0913	C21H20O11	Trifolin	Flavonoids	Flavonols	23627-87-4	B	1400	1720	3560	55000	127000	65000	1.28484	36.976	5.20852	up
mws1066	C27H32O14	Narirutin	Flavonoids	Dihydroflavone	14259-46-2	B	9	9	9	4650	6520	5980	1.31831	635.185	9.31103	up
mws1073	C27H30O15	Apigenin 6,8-C-diglucoside	Flavonoids	Flavonoid	23666-13-9	A	4180	7510	2990	771000	787000	1250000	1.31325	191.281	7.57955	up
mws1140	C15H12O5	Naringenin chalcone(4,2',4',6'-Tetrahydroxychalcone)	Flavonoids	Chalcones	73692-50-9	B	525	641	1290	9	9	9	1.31283	0.0109935	-6.50721	down
mws1292	C26H28O14	Isoschaftoside	Flavonoids	Flavonoid carbonoside	52012-29-0	B	3340	6570	1150	602000	790000	1140000	1.30104	228.933	7.83878	up
mws1660	C26H28O14	Schaftoside	Flavonoids	Flavonoid carbonoside	51938-32-0	A	9	9	9	1970	5910	5930	1.30942	511.481	8.99854	up
mws1661	C28H32O15	Diosmin	Flavonoids	Flavonoid	520-27-4	A	14600	4030	4430	6740000	8200000	8250000	1.31118	1005.64	9.97389	up
mws2209	C21H20O11	Astragalin	Flavonoids	Flavonols	480-10-4	B	1680	9350	3390	45000	74500	124000	1.23303	16.8863	4.07778	up
mws2471	C15H11O7	Delphinidin chloride	Flavonoids	Anthocyanins	528-53-0	B	4990	6270	3890	27500	27100	27200	1.30679	5.39934	2.43278	up
pmb0550	C21H21O11	Cyanidin 3-O-glucoside(Kuromanin)	Flavonoids	Anthocyanins	7084-24-4	B	19800	18500	22900	9	9	9	1.31947	0.000441176	-11.1464	down
pmb0626	C33H40O20	6-C-Hexosyl-apigenin O-hexosyl-O-hexoside	Flavonoids	Flavonoid carbonoside	-	B	684	3460	878	9	9	9	1.28976	0.00537634	-7.53916	down
pmb0645	C28H34O16	6-C-Hexosyl-hesperetin O-hexoside	Flavonoids	Flavonoid carbonoside	-	B	9	9	9	28400	30000	25300	1.3189	3100	11.5981	up
pmb0652	C26H28O14	C-Hexosyl-apigenin O-pentoside	Flavonoids	Flavonoid carbonoside	-	B	9	9	9	13900	12700	16000	1.31915	1577.78	10.6237	up
pmb0665	C27H30O16	Luteolin 8-C-hexosyl-O-hexoside	Flavonoids	Flavonoid	-	B	44600	38900	41600	11100	21400	19400	1.20329	0.414868	-1.26928	down
pmb0736	C23H24O12	Tricin 7-O-hexoside	Flavonoids	Flavonoid	-	B	9	9	9	928000	937000	688000	1.31877	94555.6	16.5289	up
pmb3007	C22H20O12	Chrysoeriol O-glucuronic acid	Flavonoids	Flavonoid	-	B	9	9	9	2490	27800	101000	1.26957	4862.59	12.2475	up
pmb3012	C22H22O11	Chrysoeriol 7-O-hexoside	Flavonoids	Flavonoid	-	B	9	9	9	627000	714000	990000	1.31893	86333.3	16.3976	up
pmb3043	C29H34O16	Tricin 5-O-rutinoside	Flavonoids	Flavonoid	-	B	9	9	9	154000	140000	74900	1.31726	13663	13.738	up
pmb3053	C27H24O11	Tricin O-eudesmic acid	Flavonoids	Flavonoid	-	B	9	9	9	2720	2240	2380	1.31901	271.852	8.08668	up
pme0001	C28H34O15	Hesperetin 7-O-neohesperidoside(Neohesperidin)	Flavonoids	Dihydroflavone	13241-33-3	B	9	9	9	39900	84000	60300	1.31716	6822.22	12.736	up
pme0369	C27H30O15	Kaempferol 3-O-rutinoside(Nicotiflorin)	Flavonoids	Flavonols	17650-84-9	B	9	9	9	366000	640000	644000	1.31829	61111.1	15.8991	up
pme1605	C27H30O15	Kaempferol 3-O-robinobioside(Biorobin)	Flavonoids	Flavonols	17297-56-2	A	9	9	9	431000	609000	680000	1.31874	63703.7	15.9591	up
pme1665	C27H30O15	Isovitexin 7-O-glucoside(Saponarin)	Flavonoids	Flavonoid carbonoside	20310-89-8	B	9	9	9	6630	8640	9830	1.31843	929.63	9.86051	up
pmn001583	C27H30O16	Bioquercetin	Flavonoids	Flavonols	52525-35-6	B	259000	262000	463000	137000	144000	147000	1.19979	0.434959	-1.20105	down
pmp000001	C16H12O6	Hispidulin	Flavonoids	Flavonoid	1447-88-7	A	9	9	9	3350	3670	1960	1.31542	332.593	8.37761	up
pmp000116	C21H20O10	Apigenin-8-C-glucoside	Flavonoids	Flavonoid carbonoside	3681-93-4	A	27600	12000	26300	158000	176000	236000	1.27105	8.64947	3.11261	up
pmp000126	C27H30O16	Luteolin-6,8-di-C-glucoside	Flavonoids	Flavonoid	29428-58-8	B	9	9	9	44600	57200	74500	1.31853	6529.63	12.6728	up
pmp000236	C26H28O14	Apigenin-6-C-glucose-8-xylcose	Flavonoids	Flavonoid carbonoside	-	B	9	9	9	16400	21200	25500	1.31851	2337.04	11.1905	up
pmp000239	C26H26O16	Luteolin-6-C-5-glucuronylxyloside	Flavonoids	Flavonoid	-	B	9	9	9	3910	4960	4750	1.31867	504.444	8.97855	up
pmp000411	C26H28O14	Genistein 8-C-apiosyl(1→6)glucoside	Flavonoids	Flavonoid carbonoside	-	B	9	9	9	108000	140000	197000	1.31846	16481.5	14.0086	up
pmp000413	C21H20O10	Genistein 8-C-glucoside	Flavonoids	Flavonoid carbonoside	66026-80-0	A	9	9	9	127000	139000	223000	1.31859	18111.1	14.1446	up
pmp000548	C16H12O6	Pratensein	Flavonoids	Isoflavones	2284-31-3	B	9	9	9	3160	3190	2190	1.31751	316.296	8.30513	up
pmp000576	C21H21O11+	Anthocyanin 3-O-beta-D-glucoside	Flavonoids	Anthocyanins	-	A	5400	9960	6920	168000	353000	249000	1.30265	34.5601	5.11104	up
pmp000579	C22H22O11	Diosmetin-7-O-galactoside	Flavonoids	Flavonoid	-	B	6950	42200	20900	3130000	4330000	4470000	1.29334	170.307	7.41199	up
pmp000580	C21H20O12	Isoquercitrin(Quercetin 3-O-β-D-glucoside)	Flavonoids	Flavonols	482-35-9	A	9	9	9	105000	217000	171000	1.31759	18259.3	14.1563	up
pmp000583	C22H20O12	Diosmetin-7-O-glucuronide	Flavonoids	Flavonoid	35110-20-4	A	4590	1360	2010	19800	145000	526000	1.17045	86.7839	6.43936	up
pmp000594	C28H32O15	Diosmetin-7-O-rutin	Flavonoids	Flavonoid	-	A	18800	9	5990	4000000	4360000	4840000	1.13986	532.28	9.05604	up
pmp000596	C27H30O17	Quercetin 3,7-bis-O-β-D-glucoside	Flavonoids	Flavonols	-	B	1640	3080	647	40600	38400	72000	1.27717	28.1349	4.81429	up
pmp000991	C39H50O19	Hexandraside D	Flavonoids	Flavonols	137218-02-1	B	9300	12100	11400	23700	31900	25200	1.27086	2.46341	1.30066	up
pmp001080	C28H32O15	Neodiosmin	Flavonoids	Flavonoid	38665-01-9	A	21700	2800	6360	4000000	4450000	4720000	1.29681	426.766	8.7373	up
pmp001106	C27H30O15	Vitexin-2-O-D-glucopyranoside	Flavonoids	Flavonoid carbonoside	-	A	9	9	9	149000	170000	240000	1.3188	20703.7	14.3376	up
pmp001110	C25H26O13	Apigenin-6-C-β-D-xyloside-8-C-β-Darabinoside	Flavonoids	Flavonoid carbonoside	-	A	9	9	9	49000	68600	108000	1.31768	8355.56	13.0285	up
pmp001164	C23H24O12	Iristectorin B	Flavonoids	Isoflavones	94396-09-5	B	9	9	9	64100	70200	70600	1.3191	7588.89	12.8897	up
pmp001290	C27H26O17	Apigenin-7-O-[β-D-glucuronopyranosyl(1→2)-O-β-D-glucuronopyranoside)	Flavonoids	Flavonoid	-	A	4430	3970	6020	9	9	9	1.31932	0.0018724	-9.0609	down
pmp001309	C21H20O12	6-Hydroxykaempferol-7-O-glucoside	Flavonoids	Flavonols	-	A	9	9	9	123000	283000	195000	1.3172	22259.3	14.4421	up
pmp001310	C27H30O17	6-Hydroxykaempferol-3,6-O-Diglucoside	Flavonoids	Flavonols	-	B	9	9	9	21500	26600	27200	1.31888	2788.89	11.4455	up
pmp001311	C27H30O17	6-Hydroxykaempferol-7,6-O-Diglucoside	Flavonoids	Flavonols	-	B	9	9	1960	39800	40700	63500	1.15044	72.8008	6.18588	up
pmp001314	C33H40O21	6-Hydroxykaempferol-3-O-rutin-6-O-glucoside	Flavonoids	Flavonols	-	B	1850	1750	2720	13800	11100	5530	1.21485	4.81487	2.2675	up

## Sheet: Table S6
					Table S6. Differential metabolites in the stems vs leaves of mature A. ilicifolius
Index	Formula	Compounds	Class I	Class II	CAS	Level	mSO1	mSO2	mSO3	mLO1	mLO2	mLO3	VIP	Fold_Change	Log2FC	Type
GQ512006	C27H30O16	Quercetin-3-O-glucoside-7-O-rhamnoside	Flavonoids	Flavonols	-	A	57100	77400	57400	1040000	995000	713000	1.16377	14.32	3.83996	up
mws0045	C21H20O11	Quercitrin	Flavonoids	Flavonols	522-12-3	B	1330	1880	2130	445	745	294	1.06575	0.277903	-1.84735	down
mws0047	C27H30O14	Rhoifolin	Flavonoids	Flavonoid	17306-46-6	A	227000	222000	270000	8340000	10100000	10800000	1.16981	40.6676	5.34581	up
mws0052	C21H18O11	Baicalin	Flavonoids	Flavonoid	21967-41-9	A	4900	2380	7180	25400000	30000000	28500000	1.16809	5802.21	12.5024	up
mws0057	C21H22O11	Eriodictyol 7-O-glucoside	Flavonoids	Dihydroflavone	38965-51-4	B	4500	11200	10500	82300	72200	74000	1.13245	8.72137	3.12456	up
mws0058	C16H12O6	Diosmetin	Flavonoids	Flavonoid	520-34-3	B	5220	5550	4640	9	9	9	1.17133	0.00175211	-9.15669	down
mws0061	C21H20O12	Hyperin	Flavonoids	Flavonols	482-36-0	B	6940	21700	16300	612000	619000	292000	1.14015	33.8896	5.08277	up
mws0066	C16H12O7	Isorhamnetin	Flavonoids	Flavonols	480-19-3	A	38900	41500	34600	16100	20500	17400	1.13979	0.469565	-1.0906	down
mws0089	C21H20O11	Kaempferol 7-O-glucosdie	Flavonoids	Flavonols	16290-07-6	B	55700	77500	127000	196000	254000	224000	1.04744	2.59032	1.37313	up
mws0856	C21H20O12	Spiraeoside	Flavonoids	Flavonols	20229-56-5	A	26800	50400	35700	1230000	1340000	647000	1.15407	28.4942	4.8326	up
mws0911	C15H10O5	Demethyltexasin	Flavonoids	Isoflavones	17817-31-1	B	9	9	9	5980	1920	4500	1.16382	459.259	8.84316	up
mws0913	C21H20O11	Trifolin	Flavonoids	Flavonols	23627-87-4	B	55000	127000	65000	1050000	1380000	1770000	1.14779	17.004	4.08781	up
mws1066	C27H32O14	Narirutin	Flavonoids	Dihydroflavone	14259-46-2	B	4650	6520	5980	48500	70000	76800	1.15993	11.3878	3.50941	up
mws1073	C27H30O15	Apigenin 6,8-C-diglucoside	Flavonoids	Flavonoid	23666-13-9	A	771000	787000	1250000	3420000	3130000	3440000	1.13629	3.55769	1.83094	up
mws1292	C26H28O14	Isoschaftoside	Flavonoids	Flavonoid carbonoside	52012-29-0	B	602000	790000	1140000	3100000	2450000	2550000	1.11059	3.19905	1.67764	up
mws1660	C26H28O14	Schaftoside	Flavonoids	Flavonoid carbonoside	51938-32-0	A	1970	5910	5930	19100	14000	15500	1.02446	3.51919	1.81524	up
mws2209	C21H20O11	Astragalin	Flavonoids	Flavonols	480-10-4	B	45000	74500	124000	201000	245000	227000	1.02869	2.76386	1.46668	up
pmb0626	C33H40O20	6-C-Hexosyl-apigenin O-hexosyl-O-hexoside	Flavonoids	Flavonoid carbonoside	-	B	9	9	9	1760	1360	1970	1.17042	188.519	7.55856	up
pmb0645	C28H34O16	6-C-Hexosyl-hesperetin O-hexoside	Flavonoids	Flavonoid carbonoside	-	B	28400	30000	25300	9	9	9	1.17141	0.000322581	-11.5981	down
pmb0652	C26H28O14	C-Hexosyl-apigenin O-pentoside	Flavonoids	Flavonoid carbonoside	-	B	13900	12700	16000	41000	30100	53500	1.10786	2.92488	1.54838	up
pmb2957	C24H18O10	Cyanidin O-syringic acid	Flavonoids	Anthocyanins	-	B	136000	106000	115000	16900	19100	18700	1.16698	0.153221	-2.70631	down
pmb2992	C22H20O11	Acacetin-O-glucuronic acid	Flavonoids	Flavonoid	-	B	9	9	9	28400	22600	31800	1.17112	3066.67	11.5825	up
pmb3007	C22H20O12	Chrysoeriol O-glucuronic acid	Flavonoids	Flavonoid	-	B	2490	27800	101000	1900000	1890000	2040000	1.05979	44.4055	5.47267	up
pmb3012	C22H22O11	Chrysoeriol 7-O-hexoside	Flavonoids	Flavonoid	-	B	627000	714000	990000	146000	203000	184000	1.14228	0.228657	-2.12874	down
pmb3024	C21H20O11	Luteolin C-hexoside	Flavonoids	Flavonoid	-	B	2740	3670	3540	9	9	9	1.17096	0.00271357	-8.52559	down
pmb3041	C23H22O14	Tricin O-saccharic acid	Flavonoids	Flavonoid	-	B	175000	187000	173000	905000	959000	859000	1.17026	5.08972	2.34759	up
pmb3043	C29H34O16	Tricin 5-O-rutinoside	Flavonoids	Flavonoid	-	B	154000	140000	74900	14800	8810	13000	1.13897	0.099241	-3.33292	down
pmb3053	C27H24O11	Tricin O-eudesmic acid	Flavonoids	Flavonoid	-	B	2720	2240	2380	9	9	9	1.1713	0.00367847	-8.08668	down
pmb3894	C17H14O7	Di-O-methylquercetin	Flavonoids	Flavonols	2068-02-2	A	289000	251000	501000	82500	56300	85800	1.11284	0.215754	-2.21254	down
pme0001	C28H34O15	Hesperetin 7-O-neohesperidoside(Neohesperidin)	Flavonoids	Dihydroflavone	13241-33-3	B	39900	84000	60300	13200	13200	19200	1.10065	0.247557	-2.01417	down
pme0369	C27H30O15	Kaempferol 3-O-rutinoside(Nicotiflorin)	Flavonoids	Flavonols	17650-84-9	B	366000	640000	644000	1520000	1850000	1850000	1.11048	3.16364	1.66158	up
pme1598	C22H24O11	Hesperetin 5-O-glucoside	Flavonoids	Dihydroflavonol	69651-80-5	B	24900	9	9	1150000	1350000	591000	1.00784	124.047	6.95474	up
pme1605	C27H30O15	Kaempferol 3-O-robinobioside(Biorobin)	Flavonoids	Flavonols	17297-56-2	A	431000	609000	680000	1560000	1810000	1990000	1.13123	3.11628	1.63982	up
pme2482	C7H6O3	Protocatechuic aldehyde	Flavonoids	Flavanols	139-85-5	B	43900	41100	63300	94900	93900	123000	1.07655	2.10249	1.0721	up
pmn001415	C24H20O9	Catechin-(7,8-bc)-4β-(3,4-dihydroxyphenyl)-dihydro-2-(3H)-pyranone	Flavonoids	Flavanols	-	B	9	9	9	22100	17800	18400	1.17132	2159.26	11.0763	up
pmn001416	C24H20O9	Catechin-(7,8-bc)-4α-(3,4-dihydroxyphenyl)-dihydro-2-(3H)-pyranone	Flavonoids	Flavanols	-	B	9	9	9	27300	18300	20700	1.17093	2455.56	11.2618	up
pmn001645	C24H22O14	Isorhamnetin 3-O-β-(2''-O-acetyl-β-D-glucuronide)	Flavonoids	Flavonols	-	B	9	9	9	6660	14200	17100	1.16786	1405.93	10.4573	up
pmn001697	C21H18O11	Apigenin-7-O-β-D-glucuronide	Flavonoids	Flavonoid	-	B	9	9	9	8950000	10400000	8450000	1.17151	1.02963e+06	19.9737	up
pmn001702	C21H18O12	Tetahydroxy-flavone-7-O-β-D-glucuronide	Flavonoids	Flavonoid	-	A	11400	70900	183000	27700000	32200000	36400000	1.13473	362.985	8.50377	up
pmp000001	C16H12O6	Hispidulin	Flavonoids	Flavonoid	1447-88-7	A	3350	3670	1960	9	9	9	1.16866	0.00300668	-8.37761	down
pmp000012	C21H18O12	Scutellarin	Flavonoids	Flavonoid	27740-01-8	A	41400	191000	538000	59900000	69200000	68600000	1.13663	256.62	8.00349	up
pmp000236	C26H28O14	Apigenin-6-C-glucose-8-xylcose	Flavonoids	Flavonoid carbonoside	-	B	16400	21200	25500	52200	45400	42600	1.10565	2.22187	1.15177	up
pmp000239	C26H26O16	Luteolin-6-C-5-glucuronylxyloside	Flavonoids	Flavonoid	-	B	3910	4960	4750	9	9	9	1.17121	0.00198238	-8.97855	down
pmp000411	C26H28O14	Genistein 8-C-apiosyl(1→6)glucoside	Flavonoids	Flavonoid carbonoside	-	B	108000	140000	197000	534000	435000	479000	1.11995	3.25393	1.70218	up
pmp000576	C21H21O11+	Anthocyanin 3-O-beta-D-glucoside	Flavonoids	Anthocyanins	-	A	168000	353000	249000	5640000	7260000	6840000	1.16066	25.6364	4.68012	up
pmp000578	C25H18O9	Luteolin-7-O-glucuronide	Flavonoids	Flavonoid	29741-10-4	A	43100	175000	581000	64500000	67900000	74400000	1.13638	258.791	8.01564	up
pmp000580	C21H20O12	Isoquercitrin(Quercetin 3-O-β-D-glucoside)	Flavonoids	Flavonols	482-35-9	A	105000	217000	171000	7620000	6790000	3960000	1.15654	37.2617	5.21962	up
pmp000583	C22H20O12	Diosmetin-7-O-glucuronide	Flavonoids	Flavonoid	35110-20-4	A	19800	145000	526000	9450000	11000000	12300000	1.07935	47.4088	5.56708	up
pmp000596	C27H30O17	Quercetin 3,7-bis-O-β-D-glucoside	Flavonoids	Flavonols	-	B	40600	38400	72000	16500	11600	18600	1.07859	0.309272	-1.69305	down
pmp000991	C39H50O19	Hexandraside D	Flavonoids	Flavonols	137218-02-1	B	23700	31900	25200	9	9	9	1.17119	0.000334158	-11.5472	down
pmp001106	C27H30O15	Vitexin-2-O-D-glucopyranoside	Flavonoids	Flavonoid carbonoside	-	A	149000	170000	240000	617000	560000	625000	1.13702	3.22361	1.68868	up
pmp001110	C25H26O13	Apigenin-6-C-β-D-xyloside-8-C-β-Darabinoside	Flavonoids	Flavonoid carbonoside	-	A	49000	68600	108000	360000	348000	349000	1.12551	4.68528	2.22814	up
pmp001164	C23H24O12	Iristectorin B	Flavonoids	Isoflavones	94396-09-5	B	64100	70200	70600	22400	23500	25300	1.1669	0.347487	-1.52497	down
pmp001166	C16H12O7	Irilin D	Flavonoids	Isoflavones	204590-67-0	A	9	1100	1000	71100	102000	113000	1.03767	135.657	7.08382	up
pmp001289	C28H28O18	Chrysoeriol-7-O-[β-D-glucuronopyranosyl-(1→2)-O-β-D-glucuronopyranoside]	Flavonoids	Flavonoid	-	B	9	9	9	78400	65300	58100	1.1713	7474.07	12.8677	up
pmp001290	C27H26O17	Apigenin-7-O-[β-D-glucuronopyranosyl(1→2)-O-β-D-glucuronopyranoside)	Flavonoids	Flavonoid	-	A	9	9	9	11300000	10600000	10800000	1.17152	1.21111e+06	20.2079	up
pmp001309	C21H20O12	6-Hydroxykaempferol-7-O-glucoside	Flavonoids	Flavonols	-	A	123000	283000	195000	9790000	8540000	4430000	1.15134	37.8702	5.24299	up
pmp001310	C27H30O17	6-Hydroxykaempferol-3,6-O-Diglucoside	Flavonoids	Flavonols	-	B	21500	26600	27200	9	9	9	1.17134	0.000358566	-11.4455	down
pmp001311	C27H30O17	6-Hydroxykaempferol-7,6-O-Diglucoside	Flavonoids	Flavonols	-	B	39800	40700	63500	16800	12500	15100	1.12256	0.308333	-1.69744	down
